# Supplementary material for: Long-term trends and regional variations of hypertension incidence in China: a prospective cohort study from the China Health and Nutrition Survey, 1991–2015
Source: PubMed Central journal article supplement — BMJ Open. 2021 Jan 13;11(1):e042053. doi: 10.1136/bmjopen-2020-042053 (PMC7812103; doi:10.1136/bmjopen-2020-042053), 2021-01-13
Supplement: bmjopen-2020-042053.draft_revisions.pdf [file bmjopen-2020-042053.draft_revisions.pdf]

# BMJ Open

BMJ Open is committed to open peer review. As part of this commitment we make the peer review history of every article we publish publicly available.

When an article is published we post the peer reviewers' comments and the authors' responses online. We also post the versions of the paper that were used during peer review. These are the versions that the peer review comments apply to.

The versions of the paper that follow are the versions that were submitted during the peer review process. They are not the versions of record or the final published versions. They should not be cited or distributed as the published version of this manuscript.

BMJ Open is an open access journal and the full, final, typeset and author-corrected version of record of the manuscript is available on our site with no access controls, subscription charges or pay-per-view fees (<http://bmjopen.bmj.com>).

If you have any questions on BMJ Open's open peer review process please email [info.bmjopen@bmj.com](mailto:info.bmjopen@bmj.com)

# BMJ Open

## Long-term trends of hypertension incidence in China: Regional variations

|                               |                                                                                                                                                                                                                                                                                                                                                 |
|-------------------------------|-------------------------------------------------------------------------------------------------------------------------------------------------------------------------------------------------------------------------------------------------------------------------------------------------------------------------------------------------|
| Journal:                      | <i>BMJ Open</i>                                                                                                                                                                                                                                                                                                                                 |
| Manuscript ID                 | bmjopen-2020-042053                                                                                                                                                                                                                                                                                                                             |
| Article Type:                 | Original research                                                                                                                                                                                                                                                                                                                               |
| Date Submitted by the Author: | 29-Jun-2020                                                                                                                                                                                                                                                                                                                                     |
| Complete List of Authors:     | Luo, Yunmei; Sichuan University West China Hospital<br>Xia, Fan; Sichuan University West China Hospital<br>Yu, Xuexin; Sichuan University West China Hospital<br>Li, Peiyi; Sichuan University West China Hospital<br>Huang, Wenzhi; Sichuan University West China Hospital, Department of Infection Control<br>zhang, wei; Sichuan University, |
| Keywords:                     | Hypertension < CARDIOLOGY, EPIDEMIOLOGY, PUBLIC HEALTH                                                                                                                                                                                                                                                                                          |
|                               |                                                                                                                                                                                                                                                                                                                                                 |

SCHOLARONE™  
Manuscripts

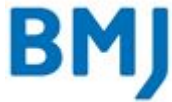

I, the Submitting Author has the right to grant and does grant on behalf of all authors of the Work (as defined in the below author licence), an exclusive licence and/or a non-exclusive licence for contributions from authors who are: i) UK Crown employees; ii) where BMJ has agreed a CC-BY licence shall apply, and/or iii) in accordance with the terms applicable for US Federal Government officers or employees acting as part of their official duties; on a worldwide, perpetual, irrevocable, royalty-free basis to BMJ Publishing Group Ltd ("BMJ") its licensees and where the relevant Journal is co-owned by BMJ to the co-owners of the Journal, to publish the Work in this journal and any other BMJ products and to exploit all rights, as set out in our [licence](#).

The Submitting Author accepts and understands that any supply made under these terms is made by BMJ to the Submitting Author unless you are acting as an employee on behalf of your employer or a postgraduate student of an affiliated institution which is paying any applicable article publishing charge ("APC") for Open Access articles. Where the Submitting Author wishes to make the Work available on an Open Access basis (and intends to pay the relevant APC), the terms of reuse of such Open Access shall be governed by a Creative Commons licence – details of these licences and which [Creative Commons](#) licence will apply to this Work are set out in our licence referred to above.

Other than as permitted in any relevant BMJ Author's Self Archiving Policies, I confirm this Work has not been accepted for publication elsewhere, is not being considered for publication elsewhere and does not duplicate material already published. I confirm all authors consent to publication of this Work and authorise the granting of this licence.

---

## Title Page

### Title : Long-term trends of hypertension incidence in China: Regional variations

Yun-Mei Luo,<sup>1,2</sup> Fan Xia,<sup>3</sup> Xue-Xin Yu,<sup>4</sup> Pei-Yi Li,<sup>1</sup> Wen-Zhi Huang,<sup>5</sup> Wei Zhang<sup>4</sup>

---

<sup>1</sup>Institute of Hospital Management, West China Hospital, Sichuan University, Chengdu, China

<sup>2</sup>West China Medical Publishers, West China Hospital, Sichuan University, Chengdu, China

<sup>3</sup>Department of Neurosurgery, West China Hospital, Sichuan University, Chengdu, China

<sup>4</sup>West China Biomedical Big Data Center, West China Hospital, Sichuan University, Chengdu, China

<sup>5</sup>Department of Infection Control, West China Hospital, Sichuan University, Chengdu, China

---

#### Correspondence to

Wei Zhang; weizhanghx@163.com

\* Yun-Mei Luo, Fan Xia, and Xue-Xin Yu contributed equally to the article.

---

#### ABSTRACT

**Objective** The aim is to explore the trends of hypertension incidence and regional variations in China from 1991 to 2015.

**Design** A dynamic prospective cohort study.

**Setting** Population based study.

---

**Participants** 12 952 Chinese adults from the China Health and Nutrition Survey (CHNS).

**Primary outcome measures** Long-term trend of hypertension incidence in Chinese adults and risk factors for occurrence of hypertension.

**Results** Age-standardized hypertension incidence increased from 40.8 per 1 000 person-years (95% CI, 38.3 to 43.4) between 1993 and 1997 to 48.6 (95% CI, 46.1 to 51.0) between 2011 and 2015. The increasing trends were further supported by results from subsequent extended Cox proportional hazard model. In addition, results from the modelling analysis showed that individuals in Eastern, Central, and Northeastern China had greater risks of hypertension occurrence in comparison with their counterparts in Western China.

**Conclusion** Hypertension incidence increased during the study period. The growth called for more attention on the health education and health promotion of individuals with great risks.

---

#### **Strengths and limitations of this study**

① The dynamic cohort study-design employed individuals from diverse social and geographic contexts, which enabled us to depict the long-term trends of hypertension incidence and regional disparities in the context of China's rapid social development and population aging.

② We adopted both self-reported health outcomes and objective outcomes from physical tests, which avoided the recall bias and underestimation in underserved areas.

③ We did not employ a national-representative sample and did not include individuals from other provinces in China, which undermined the representation of our findings. As a community-based survey, CHNS excluded institutionalized individuals, which further diminished the representation of our findings among

1  
2  
3  
4  
5 Chinese.  
6  
7  
8

---

9 ④In addition, we did not distinguish hypertension, and future research is necessary.  
10  
11  
12  
13  
14  
15  
16  
17  
18  
19  
20  
21  
22  
23  
24  
25  
26  
27  
28  
29  
30  
31  
32  
33  
34  
35  
36  
37  
38  
39  
40  
41  
42  
43  
44  
45  
46  
47  
48  
49  
50  
51  
52  
53  
54  
55  
56  
57  
58  
59  
60

---

## INTRODUCTION

Along with aging population, non-communicable chronic diseases, particularly stroke and ischemic heart disease, have led to great burden of disease, deaths, and years of life lost (YLLs) in both developed and developing countries.<sup>1 2</sup> Connected closely with various cardiovascular diseases,<sup>3 4</sup> high systolic blood pressure was ranked as the leading risk factor of risk-attributable disability-adjusted life-years (DALYs) among selected 195 countries and territories.<sup>5</sup> For instance, high systolic blood pressure accounted for 2.54 million deaths and more than 5% of DALYs in China in 2017.<sup>6</sup>

Existing evidence has confirmed a worldwide high prevalence of hypertension.<sup>4-6</sup> Countries, such as Singapore<sup>6</sup> and Korea<sup>7</sup>, had a significant proportion of individuals with hypertension. Likewise, with the extended life expectancy,<sup>8</sup> changes in lifestyle behaviors,<sup>9</sup> and rapid urbanization,<sup>10</sup> developing countries, such as China, experienced a substantial increase in the prevalence of hypertension, ranging from 13.6% in 1991 to 27.9% in 2015.<sup>11</sup>

Although the increasing prevalence of hypertension provided critical information for public health practice and disease control programs, it could not accurately depict the epidemiologic transition as the incidence measure.<sup>12</sup> Prior studies have indicated that the increasing prevalence could coexist with the decreasing incidence in the context of healthy aging.<sup>13</sup> For evidence-based health-promoting initiatives, empirical research on hypertension incidence is warranted.

However, research on the long-term trends of the incidence of hypertension from China is scarce and relatively outdated.<sup>14 15</sup> This is an important knowledge gap because developing countries are experiencing unprecedented social development. Up-to-date information among developing countries could greatly

1  
2  
3  
4  
5 contribute to depict global epidemiologic transitions. Moreover, regional disparities are a major health  
6  
7 concern in China as a result of inequitable socio-economic development and health care resource  
8  
9 distribution,<sup>16-18</sup> while the existing research provides insufficient information regarding the regional  
10  
11 disparities in the hypertension incidence.<sup>19-21</sup>  
12  
13  
14

15  
16 Hence, this study aims to explore the long-term trends of hypertension incidence among Chinese from  
17  
18 diverse social and geographic contexts. In addition, we are particularly interested in regional variations while  
19  
20 taking the individual-level risk factors into account.  
21  
22  
23

## 24 25 **METHODS**

### 26 27 **Data source**

28  
29 The present study derived data from the China Health and Nutrition Survey (CHNS). CHNS has been  
30  
31 collaboratively conducted by Carolina Population Center at the University of North Carolina at Chapel Hill  
32  
33 and the National Institute for Nutrition and Health (NINH, former National Institute of Nutrition and Food  
34  
35 Safety) at the Chinese Center for Disease Control and Prevention. Initiated in 1989, CHNS consisted of ten-  
36  
37 wave data in 1989, 1991, 1993, 1997, 2000, 2004, 2006, 2009, 2011, and 2015, respectively. Overall, CHNS  
38  
39 employed a multistage random cluster method to draw the study sample, which included over 30 000  
40  
41 individuals from three provincial-level cities and twelve provinces. Individuals in the survey came from  
42  
43 diverse social, geographic, and cultural contexts. CHNS employed face-to-face questionnaire interviews to  
44  
45 collect data, and the physical health examinations were conducted by well-trained investigators. Information  
46  
47 regarding survey design, data collection, and quality control could be retrieved from the cohort profile.<sup>22</sup>  
48  
49  
50  
51  
52  
53  
54  
55  
56  
57

### 58 **Study design and exclusion criteria**

59  
60



The present study employed a dynamic cohort study-design as not all individuals entered the cohort at the same time. To evaluate the long-term trends of hypertension incidence, we excluded individuals (a) without individual ID and community ID; (b) aged under 18 because of the low incidence of hypertension among children and teenagers; (c) with hypertension in his/her first investigation; (d) with only one observation or only one record of hypertension status; and (e) were pregnant during the study period to exclude gestational hypertension. Furthermore, we excluded observations after the diagnosis of hypertension (figure 1).

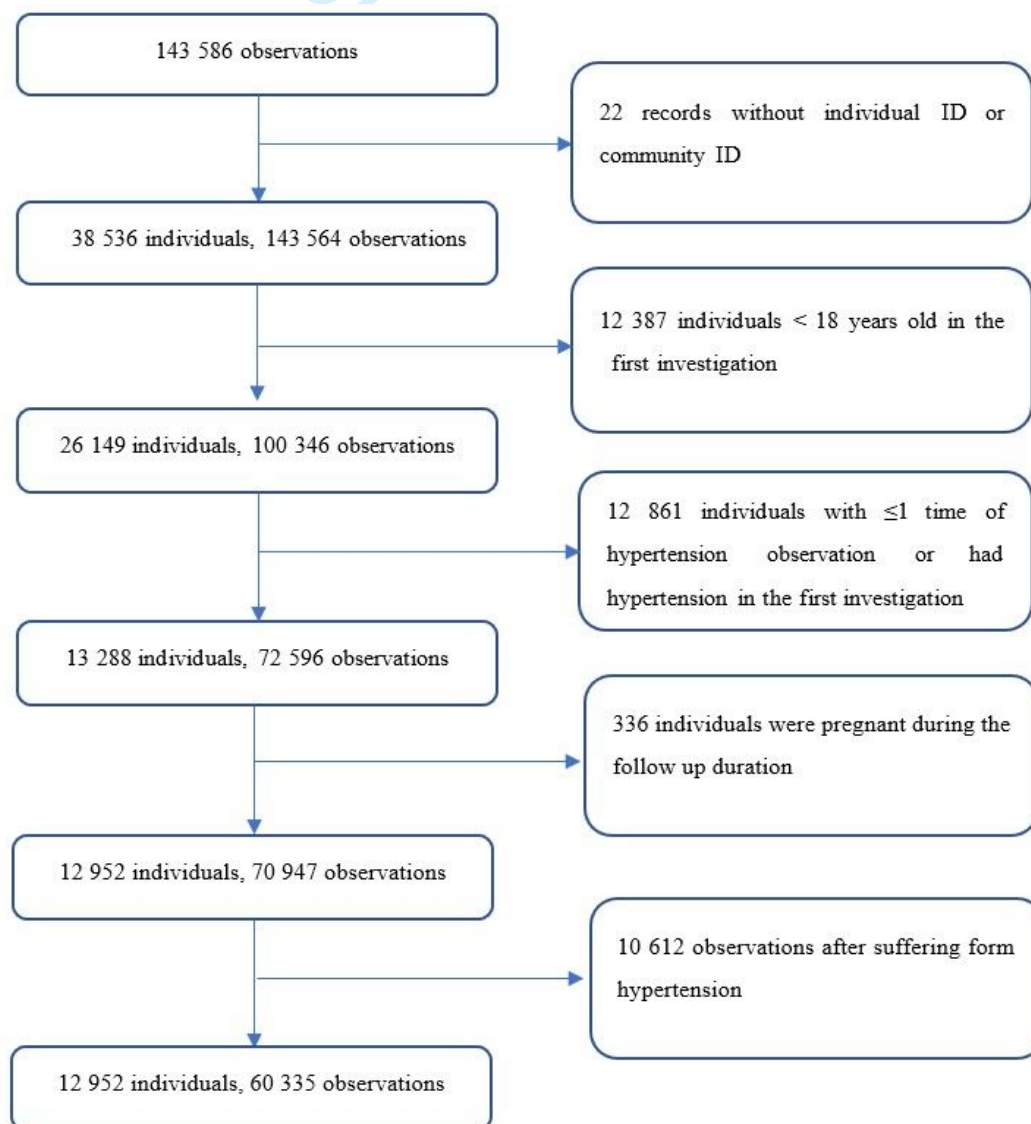

Figure 1 Flowchart showing the selection of the subjects who were included in the final analysis of

hypertension incidence in China

## Exposure

The primary exposure variable of this study were time entering the cohort and geographic regions. For modeling analyses, it was not feasible to treat the waves as continuous variables, and therefore we respectively grouped the individuals entering the cohort from (a) 1991, 1993, and 1997; (b) 2000, 2004, 2006, and 2009; and (c) 2011 and 2015. In this case, two dummies were introduced in the model with individuals from 1991 to 1997 as the reference group. Geographic regions were defined according to the bulletin of the National Bureau of Statistics of China. Specifically, we grouped individuals from (a) Beijing, Shanghai, Jiangsu Province, Zhejiang Province, and Shandong Province as Eastern China; (b) Henan Province, Hubei Province, and Hunan Province as Central China; (c) Liaoning Province and Heilongjiang Province as Northeastern China; and (d) Yunnan Province, Guangxi Zhuang Autonomous Region, Guizhou Province, Chongqing, and Shanxi Province as Western China.

## Outcomes

We included incidence of hypertension as the primary outcome. First, we adopted self-reported hypertension, which was derived from the answer to the question, “Has a doctor ever told you that you suffer from high blood pressure?”. If individuals self-reported no hypertension history, the outcomes would be further supplemented by the blood pressure tests to avoid the recall bias and underestimation from self-reported measures. According to the criteria of the 2018 Clinical Guideline in China and the 2018 ESC/ESH HTN Guideline,<sup>23</sup> hypertension was confirmed with the systolic blood pressure (SBP)  $\geq 140$  mmHg or with the diastolic blood pressure (DBP)  $\geq 90$  mmHg. To guarantee the accuracy of the tests, the blood pressure was

1  
2  
3  
4  
5 detected in triplicate by professional health workers on the same day.  
6  
7

### 8 **Covariates**

9  
10  
11 To adjust for variations in baseline characteristics, we introduced several confounding factors that may  
12 influence the occurrence of hypertension. These factors included urban vs. rural settings, sociodemographic  
13 characteristics (age, sex, race, marital status, educational attainment, and employment status), and lifestyle  
14 attributes (BMI, smoking behaviors, alcohol consumption, and physical activity).<sup>15 24</sup>  
15  
16  
17  
18  
19  
20  
21  
22

### 23 **Statistical analysis**

24  
25  
26 First, we performed chi-square tests and Kruskal-Wallis rank-sum tests to evaluate variations in baseline  
27 characteristics over time. Second, we calculated the crude incidence of hypertension as below:<sup>25</sup>  
28  
29  
30  
31

$$32 \text{ Incidence} = \frac{\text{number of new hypertension cases}}{\text{total person - years at risk}}$$

33  
34  
35 The 'person-years at risk' is the period from the first hypertension-free year to the year when the subsequent  
36 hypertension is confirmed. In addition, we calculated the age-standardized incidence of hypertension by  
37 employing the sample from wave 2011 and wave 2015 as the standard population. Subgroup analyses were  
38 conducted by gender. To further evaluate the long-term trends of hypertension incidence, we performed an  
39 extended Cox proportional hazard model while considering geographic variations. Because the effect of age  
40 didn't conform to the proportional hazard assumption, we performed a time-dependent Cox regression model  
41 with age as a time-dependent variable. At the same time, we introduced all covariates in the model to control  
42 for the baseline variations.  
43  
44  
45  
46  
47  
48  
49  
50  
51  
52  
53  
54

55  
56 Data analyses were performed with Stata 15.0 (StataCorp, TX, USA). A two-tailed *P* value of less than 0.05  
57  
58  
59  
60

was considered statistical significance.

### Patient and public involvement

Neither patients nor members of the public were involved in this study.

## RESULTS

### Study population

Although CHNS consisted of data of 38 558 individuals with 143 586 observations from 1989 and 2015, the present study only included 12 952 individuals from 1991 to 2015 after sample selection (figure 1). Table 1 presents the distribution of observations from included individuals during the study period. For example, 5938 individuals entered the cohort in 1991, with only 912 followed-up in 2015 (table 1). Among the 12 952 participants, 5 119 suffered from hypertension during the follow-up period.

**Table 1** Observation distribution of study sample from 1991 to 2015

| wave | 1991 | 1993 | 1997 | 2000 | 2004 | 2006 | 2009 | 2011 | 2015 |
|------|------|------|------|------|------|------|------|------|------|
| 1989 |      |      |      |      |      |      |      |      |      |
| 1991 | 5938 |      |      |      |      |      |      |      |      |
| 1993 | 5166 | 677  |      |      |      |      |      |      |      |
| 1997 | 3313 | 485  | 1691 |      |      |      |      |      |      |
| 2000 | 2658 | 335  | 1451 | 1009 |      |      |      |      |      |
| 2004 | 2050 | 234  | 1037 | 813  | 837  |      |      |      |      |
| 2006 | 1722 | 188  | 865  | 642  | 684  | 376  |      |      |      |
| 2009 | 1378 | 142  | 385  | 398  | 413  | 302  | 692  |      |      |
| 2011 | 1200 | 114  | 329  | 335  | 359  | 216  | 630  | 1732 |      |
| 2015 | 912  | 86   | 250  | 236  | 231  | 152  | 353  | 1732 | 0    |

Table 2 presents the baseline characteristics of the study sample. Overall, variations existed in all baseline characteristics. For example, newly recruited individuals were older ( $P < 0.001$ ), more educated ( $P < 0.001$ ), and with a higher BMI ( $P < 0.001$ ).

**Table 2** Baseline characteristics of study individuals,  $n(\%)$ \*

| Characteristic           | Time entering the cohort |              |              | P value |
|--------------------------|--------------------------|--------------|--------------|---------|
|                          | 1991-1997                | 2000-2009    | 2011-2015    |         |
| Region                   |                          |              |              |         |
| Western                  | 2256 (27.16)             | 611 (20.97)  | 523 (30.20)  | <0.001  |
| Central                  | 2817 (33.92)             | 800 (27.45)  | 85 (4.91)    |         |
| Northeastern             | 1288 (15.51)             | 794 (27.25)  | 83 (4.79)    |         |
| Eastern                  | 1945 (23.42)             | 709 (24.33)  | 1041 (60.10) |         |
| Urban-rural              |                          |              |              |         |
| Rural                    | 5616 (67.61)             | 1717 (58.92) | 777 (44.86)  | <0.001  |
| Urban                    | 2690 (32.39)             | 1197 (41.08) | 955 (55.14)  |         |
| Age (years)              |                          |              |              |         |
| 18-29                    | 2374 (28.58)             | 695 (23.85)  | 221 (12.76)  | <0.001  |
| 30-39                    | 2382 (28.68)             | 854 (29.31)  | 345 (19.92)  |         |
| 40-49                    | 1752 (21.09)             | 621 (21.31)  | 424 (24.48)  |         |
| 50-59                    | 1004 (12.09)             | 405 (13.90)  | 456 (26.33)  |         |
| ≥60                      | 794 (9.56)               | 339 (11.63)  | 286 (16.51)  |         |
| Sex                      |                          |              |              |         |
| Male                     | 3986 (47.99)             | 1168 (40.08) | 736 (42.49)  | <0.001  |
| Female                   | 4320 (52.01)             | 1746 (59.92) | 996 (57.51)  |         |
| BMI (kg/m <sup>2</sup> ) |                          |              |              |         |
| <18.5                    | 763 (9.27)               | 191 (6.60)   | 60 (3.46)    | <0.001  |
| 18.5-23.9                | 6012 (73.07)             | 1776 (61.35) | 955 (55.14)  |         |
| 24.0-27.9                | 1238 (15.05)             | 760 (26.25)  | 545 (31.47)  |         |

|                      |                                   |              |              |              |        |
|----------------------|-----------------------------------|--------------|--------------|--------------|--------|
|                      | ≥28                               | 215 (2.61)   | 168 (5.80)   | 172 (9.93)   |        |
| Race                 |                                   |              |              |              |        |
|                      | Other                             | 1038 (12.59) | 340 (11.69)  | 72 (4.17)    | <0.001 |
|                      | Han                               | 7204 (87.41) | 2568 (88.31) | 1656 (95.83) |        |
| Marital status       |                                   |              |              |              |        |
|                      | Other                             | 1183 (14.29) | 341 (11.82)  | 192 (11.14)  | <0.001 |
|                      | Married                           | 7098 (85.71) | 2545 (88.18) | 1531 (88.86) |        |
| Education attainment |                                   |              |              |              |        |
|                      | Primary school and below          | 4416 (53.81) | 741 (26.43)  | 410 (23.73)  | <0.001 |
|                      | Middle school                     | 2377 (28.97) | 1103 (39.34) | 457 (26.45)  |        |
|                      | High school or equivalent         | 1240 (15.11) | 742 (26.46)  | 472 (27.31)  |        |
|                      | College and above                 | 173 (2.11)   | 218 (7.77)   | 389 (22.51)  |        |
| Employed             |                                   |              |              |              |        |
|                      | No                                | 1145 (13.85) | 1044 (35.95) | 716 (41.34)  | <0.001 |
|                      | Yes                               | 7121 (86.15) | 1860 (64.05) | 1016 (58.66) |        |
| Smoking              |                                   |              |              |              |        |
|                      | Never or smoking cessation        | 5300 (64.72) | 2163 (74.97) | 1326 (77.18) | <0.001 |
|                      | Current smoker, cigarettes < 20/d | 1481 (18.09) | 370 (12.82)  | 205 (11.93)  |        |
|                      | Current smoker, cigarettes ≥ 20/d | 1408 (17.19) | 352 (12.20)  | 187 (10.88)  |        |
| Alcohol consumption  |                                   |              |              |              |        |
|                      | Never                             | 5042 (61.82) | 2037 (70.93) | 1116 (65.03) | <0.001 |
|                      | Not more than once per month      | 469 (5.75)   | 102 (3.55)   | 144 (8.39)   |        |
|                      | 1–3 times per month               | 661 (8.10)   | 173 (6.02)   | 127 (7.40)   |        |
|                      | 1–2 times per week                | 781 (9.58)   | 227 (7.90)   | 127 (7.40)   |        |
|                      | 3–4 times per week                | 450 (5.52)   | 126 (4.39)   | 64 (3.73)    |        |
|                      | On a daily basis                  | 753 (9.23)   | 207 (7.21)   | 138 (8.04)   |        |
| Physical activity    |                                   |              |              |              |        |
|                      | Very light                        | 997 (12.56)  | 780 (27.73)  | 823 (49.46)  | <0.001 |
|                      | Light                             | 1307 (16.46) | 799 (28.40)  | 453 (27.22)  |        |

---

|                     |              |             |             |
|---------------------|--------------|-------------|-------------|
| Moderate            | 1291 (16.26) | 461 (16.39) | 209 (12.56) |
| Heavy or very heavy | 4344 (54.71) | 773 (27.48) | 179 (10.76) |

---

\*Overall, we included 11 685 individuals in the modelling analyses after excluding 97 individuals without BMI, 74 without race, 62 without marital status, 214 without education attainment, 50 without employment status, 160 without smoking history, 208 without alcohol consumption, and 449 without physical activity. (Missing rate 9.78 %)

### Crude and age-standardized incidence

Table 3 presents the crude and age-standardized hypertension incidence during the study period. For the calculation of hypertension incidence, we employed a full sample of 12 952 individuals with 60 335 observations. The age-standardized incidence of hypertension witnessed a significant increase, ranging from 40.8 per 1 000 person-years (95% CI: 38.3 to 43.4) between 1993 and 1997 to 48.6 per 1 000 person-years (95% CI: 46.1 to 51.0) between 2011 and 2015. The increasing pattern was also exhibited among men (1993-1997: 46.2, 95% CI: 42.1 to 50.4; 2011-2015: 55.7, 95% CI: 51.7 to 59.7) and women (1993-1997: 36.5, 95% CI: 33.2 to 39.7; 2011-2015: 43.3, 95% CI: 40.2 to 46.3).

**Table 3** Crude and age-standardized incidence over time (per 1000 person-years)

| <b>Incidence</b>                    | <b>1991</b> | <b>1993-1997</b> | <b>2000-2009</b> | <b>2011-2015</b> |
|-------------------------------------|-------------|------------------|------------------|------------------|
| Total                               |             |                  |                  |                  |
| Case (person-year)                  | -           | 1114 (35486)     | 2571 (70575)     | 1434 (29492)     |
| Crude incidence (95% CI)            | -           | 31.3 (29.6-33.2) | 36.4 (35.0-37.8) | 48.6 (46.1-51.2) |
| Age-standardized incidence (95% CI) | -           | 40.8 (38.3-43.4) | 41.5 (39.9-43.2) | 48.6 (46.1-51.0) |
| Male                                |             |                  |                  |                  |
| Case (person-year)                  | -           | 594 (17530)      | 1292 (32524)     | 699 (12532)      |
| Crude incidence (95% CI)            | -           | 33.8 (31.2-36.7) | 39.7 (37.6-41.9) | 55.7 (51.7-60.0) |
| Age-standardized incidence (95% CI) | -           | 46.2 (42.1-50.4) | 45.7 (43.0-48.3) | 55.7 (51.7-59.7) |
| Female                              |             |                  |                  |                  |
| Case (person-year)                  | -           | 520 (17956)      | 1279 (38051)     | 735 (16960)      |
| Crude incidence (95% CI)            | -           | 28.9 (26.5-31.5) | 33.6 (31.8-35.5) | 43.3 (40.3-46.5) |
| Age-standardized incidence (95% CI) | -           | 36.5 (33.2-39.7) | 38.0 (35.9-40.1) | 43.3 (40.2-46.3) |

**Extended Cox proportional hazard analysis**

For the modeling analysis, we included 11 685 individuals without missing data (missing rate, 9.78%). The duration from free of hypertension to hypertension diagnosed ranged from 2 to 24 years, with a median of 9 years (table 4). The duration was most commonly seen in 2 (14.32%), 4 (11.19%), 6 (11.45%), and 9 years (13.13%).



**Table 4** Unadjusted time from hypertension-free to hypertension

| Time (year) | <i>n</i> | Proportion (%) |
|-------------|----------|----------------|
| 2           | 733      | 14.32          |
| 3           | 227      | 4.43           |
| 4           | 573      | 11.19          |
| 5           | 94       | 1.84           |
| 6           | 586      | 11.45          |
| 7           | 253      | 4.94           |
| 9           | 672      | 13.13          |
| 11          | 121      | 2.36           |
| 12          | 82       | 1.60           |
| 13          | 383      | 7.48           |
| 14          | 55       | 1.07           |
| 15          | 357      | 6.97           |
| 16          | 45       | 0.88           |
| 18          | 425      | 8.30           |
| 20          | 187      | 3.65           |
| 22          | 43       | 0.84           |
| 24          | 283      | 5.35           |
| Total       | 5119     | 100.0          |

Table 5 presents results from extended Cox proportional hazard analysis while taking variations in baseline characteristics into account. First, the increasing trends of hypertension incidence were robust, as suggested by the modeling results. Specifically, individuals entered the cohort from 2000 to 2009 (aHR = 1.10, 95% CI: 1.01 to 1.21) and those from 2011 to 2015 (aHR = 1.19, 95% CI: 1.04 to 1.37) had a higher risk of hypertension in comparison with individuals entering the cohort from 1991 to 1997. With reference to

regional variations, individuals in Central (aHR = 1.26, 95% CI: 1.16 to 1.37), Northeastern (aHR = 1.56, 95% CI: 1.41 to 1.72), and Eastern China (aHR = 1.48, 95% CI: 1.36 to 1.63) respectively had a higher risk of hypertension occurrence relative to their counterparts in Western China.

**Table 5** Extended Cox proportional hazard analysis of hypertension incidence

| Characteristic           | aHR (95% CI)      | P value |
|--------------------------|-------------------|---------|
| Time to enter the cohort |                   |         |
| 1991-1997                | Ref.              |         |
| 2000-2009                | 1.10 (1.01-1.21)  | 0.025   |
| 2011-2015                | 1.19 (1.04-1.37)  | 0.010   |
| Geographic region        |                   |         |
| Western                  | Ref.              |         |
| Central                  | 1.26 (1.16-1.37)  | <0.001  |
| Northeastern             | 1.56 (1.41-1.72)  | <0.001  |
| Eastern                  | 1.48 (1.36-1.63)  | <0.001  |
| Urban (vs. rural)        | 0.94 (0.88-1.01)  | 0.109   |
| Age*                     |                   |         |
| 18-29                    | Ref.              |         |
| 30-39                    | 1.93 (1.41-2.65)  | <0.001  |
| 40-49                    | 3.99 (2.93-5.43)  | <0.001  |
| 50-59                    | 5.16 (3.74-7.12)  | <0.001  |
| ≥60                      | 9.11 (6.50-12.77) | <0.001  |
| Female (vs. male)        | 0.81 (0.74-0.88)  | <0.001  |
| BMI (kg/m <sup>2</sup> ) |                   |         |
| <18.5                    | Ref.              |         |
| 18.5-23.9                | 1.31 (1.16-1.48)  | <0.001  |
| 24.0-27.9                | 2.07 (1.81-2.36)  | <0.001  |
| ≥28                      | 2.82 (2.37-3.34)  | <0.001  |

|                                   |                  |       |
|-----------------------------------|------------------|-------|
| Race (Han vs. others)             | 1.11 (1.01-1.23) | 0.032 |
| Married (vs. others)              | 0.92 (0.83-1.02) | 0.149 |
| Education attainment              |                  |       |
| Primary school and below          | Ref.             |       |
| Middle school                     | 0.91 (0.84-0.99) | 0.020 |
| High school or equivalent         | 0.86 (0.77-0.95) | 0.002 |
| College and above                 | 0.82 (0.68-0.98) | 0.033 |
| Employed (yes vs. no)             | 0.90 (0.82-0.99) | 0.036 |
| Smoking                           |                  |       |
| Never or smoking cessation        | Ref.             |       |
| Current smoker, cigarettes < 20/d | 0.98 (0.89-1.07) | 0.752 |
| Current smoker, cigarettes ≥ 20/d | 1.05 (0.96-1.16) | 0.237 |
| Alcohol consumption               |                  |       |
| never                             | Ref.             |       |
| Not more than once per month      | 0.89 (0.78-1.03) | 0.125 |
| 1–3 times per month               | 1.17 (1.04-1.32) | 0.006 |
| 1–2 times per week                | 1.00 (0.89-1.12) | 0.963 |
| 3–4 times per week                | 1.05 (0.92-1.21) | 0.412 |
| On a daily basis                  | 1.18 (1.06-1.31) | 0.002 |
| Physical activity                 |                  |       |
| very light                        | Ref.             |       |
| light                             | 0.92 (0.83-1.02) | 0.154 |
| moderate                          | 0.99 (0.88-1.11) | 0.930 |
| heavy and very                    | 0.91 (0.82-1.02) | 0.118 |

\*Estimated time effect of age,  $P < 0.001$

1  
2  
3  
4  
5 In addition, there existed no urban-rural differences in developing hypertension (table 5). Risks of incident  
6 hypertension increased with age, BMI, and alcohol consumption, while it was negatively associated with  
7 educational attainment. Women had a lower risk of incident hypertension compared with men (aHR = 0.81,  
8 95% CI: 0.74 to 0.88). Relative to those without a job, employees had a lower risk of developing hypertension  
9 (aHR = 0.90, 95% CI: 0.82 to 0.99). Han individuals were significantly associated with a higher risk (aHR =  
10 1.11, 95% CI: 1.01 to 1.23) relative to the minority.  
11  
12  
13  
14  
15  
16  
17  
18  
19  
20

## 21 **DISCUSSION**

22  
23  
24 By employing a study sample of 12 925 individuals from diverse social and geographic contexts, we found  
25 the age-standardized incidence of hypertension increased during the study period. The increasing pattern  
26 remained even after controlling for variations in baseline characteristics. Furthermore, we found that  
27 individuals in economically developed Eastern, Central, and Northeastern China had greater risks of incident  
28 hypertension in comparison with those in Western China.  
29  
30  
31  
32  
33  
34  
35  
36  
37  
38

39 Instead of focusing on the incidence measure, the vast majority of prior studies focused on the prevalence  
40 measure. For example, one of the previous studies in China indicated that the prevalence of hypertension  
41 rose substantially from 13.6% in 1991 to 27.9% in 2015.<sup>11</sup> The findings were further supplemented by results  
42 from Lu *et al.* (2017), which suggested a higher prevalence of hypertension among those aged between 35  
43 and 75 years old (44.7%).<sup>26</sup>  
44  
45  
46  
47  
48  
49  
50

51  
52 However, our focus on the incidence measure provided a more accurate reflection of the epidemiologic  
53 transition of hypertension in China. In addition, our findings updated the trends of hypertension incidence  
54 in comparison with that from Liang *et al.* (2014).<sup>15</sup> Even though hypertension incidence appeared to vary  
55  
56  
57  
58  
59  
60

1  
2  
3  
4  
5 across countries,<sup>27-29</sup> the comparison is untenable because we adopted different standard populations. Further  
6  
7  
8 empirical research across countries is warranted.  
9

10  
11 With the rapid economic development, people often change their dietary patterns from light diet to high salt  
12  
13 and fat diet along with a secondary lifestyle.<sup>30</sup> These changes would significantly impact the prevalence and  
14  
15 control of hypertension in China.<sup>30</sup> In addition, due to data limitation, we didn't introduce several potential  
16  
17 risks factors, such as sodium intake or dietary pattern, parental history, psychological status, ambient air  
18  
19 pollutants, working hours, and household income.<sup>31-34</sup> These factors may explain the residual time-effects in  
20  
21  
22 the model as well.  
23  
24  
25

26  
27 Although existing evidence on the regional disparities of hypertension incidence is scant, prior research  
28  
29 indicates that Central, Northeastern, and Eastern China had a higher prevalence of hypertension compared  
30  
31 with Western China,<sup>35</sup> which is in line with our findings. In sharp contrast, prior investigators have noted  
32  
33 that Northeastern and Central China had lower all-cause mortality rates relative to Western China.<sup>36</sup> These  
34  
35 findings appear to suggest that individuals in China's economically developed regions are experiencing  
36  
37 extended life expectancy with relatively unhealthy aging.<sup>12</sup> However, one should be aware of the possibility  
38  
39 that although individuals in Western China had lower risks of hypertension compared with the other three  
40  
41  
42 regions, local public awareness and timely treatment could be a challenging issue.  
43  
44  
45

46  
47 Differed from previous studies,<sup>15 37</sup> no urban-rural disparities were observed in the present study. This may  
48  
49 be a result of the narrow gap of lifestyle between rural and urban residents. With the rapid economic  
50  
51 development and urbanization in the past few decades, the lifestyle and dietary pattern of rural residents are  
52  
53 approaching to those of their counterparts in urban China.<sup>9 10</sup> This possibility has been further supported by  
54  
55  
56  
57  
58  
59  
60

1  
2  
3  
4  
5 the fact that the prevalence of hypertension in rural China exceeded that of urban China in 2015.<sup>26</sup> Taking  
6  
7  
8 into account the lower treatment rate and insufficient awareness among rural residents,<sup>38</sup> one should direct  
9  
10 more attention to rural China.

11  
12  
13  
14 Moreover, we found that smoking history was not associated with incident hypertension. The effect of  
15  
16 smoking on the development of the chronic disease is unclear and appears to differ across life courses.<sup>39-41</sup>

17  
18  
19 In addition, prior research based on Korean has found a J-shaped association between physical activity and  
20  
21 incident hypertension,<sup>42</sup> while the present study on Chinese did not observe a similar association, which is  
22  
23 in line with findings based on Japanese.<sup>43</sup> The effect of physical activity on the development of hypertension  
24  
25 seems to be controversial and varies across countries. Further analyses are warranted.

26  
27  
28  
29  
30 Consistent with the previous studies,<sup>44-47</sup> several risk factors, including age, gender, educational attainment,  
31  
32 race, alcohol consumption, and BMI, were confirmed by our analyses. The growing incidence of  
33  
34 hypertension emphasizes the early prevention, education, detection, and management for hypertension.<sup>48</sup>

35  
36  
37  
38 Mentoring aforementioned lifestyle behaviors, such as alcohol consumption, may be helpful to constrain the  
39  
40 hypertension incidence.<sup>49</sup> Public health and lifestyle interventions targeting high-risk individuals, such as  
41  
42 the elderly, men, and obese population, hold promise.

## 43 44 45 46 **Conclusion**

47  
48  
49 Hypertension incidence increased during the study period. Individuals in Eastern, Central, and Northeastern  
50  
51 China had greater risks of hypertension occurrence in comparison with their counterparts in Western China.  
52  
53 In addition, risks of incident hypertension increased with age, BMI, and alcohol consumption, while it was  
54  
55 negatively associated with educational attainment. The growth of hypertension incidence called for more  
56  
57  
58  
59  
60

1  
2  
3  
4  
5 attention on the health education and health promotion of individuals with great risks.  
6  
7

### 8 **Strengths and limitations of this study**

9

10  
11 The present study has two major strengths. First, the dynamic cohort study-design employed individuals  
12 from diverse social and geographic contexts, which enabled us to depict the long-term trends of hypertension  
13 incidence and regional disparities in the context of China's rapid social development and population aging.  
14  
15 In addition, we adopted both self-reported health outcomes and objective outcomes from physical tests,  
16  
17 which avoided the recall bias and underestimation in underserved areas.  
18  
19

20  
21 Nevertheless, this study is subject to several limitations. First, we did not employ a national-representative  
22  
23 sample and did not include individuals from other provinces in China, which undermined the representation  
24  
25 of our findings. As a community-based survey, CHNS excluded institutionalized individuals, which further  
26  
27 diminished the representation of our findings among Chinese. In addition, we did not distinguish  
28  
29 hypertension, and future research is necessary.  
30  
31  
32  
33  
34  
35  
36  
37  
38  
39  
40  
41  
42

43 **Acknowledgments** We thank the National Institute for Nutrition and Health, China Center for Disease Control and  
44  
45 Prevention, Carolina Population Center at(P2C HD050924, T32 HD007168), the University of North Carolina at Chapel Hill,  
46  
47 the NIH (R01-HD30880, DK056350, R24 HD050924, and R01-HD38700) and the NIH Fogarty International Center (D43  
48  
49 TW009077, D43 TW007709) for financial support for the CHNS data collection and analysis files from 1989 to 2015 and  
50  
51 future surveys, and the China-Japan Friendship Hospital, Ministry of Health for support for CHNS 2009, Chinese National  
52  
53 Human Genome Center at Shanghai since 2009, and Beijing Municipal Center for Disease Prevention and Control since 2011.  
54  
55  
56  
57

58  
59 **Contributors** WZ designed this study and revised the manuscript. Y-ML, FX, and X-XY performed data clean, statistical  
60

analysis, and wrote the first draft of the manuscript, which P-YL and W-ZH subsequently revised. All authors read the article and approve it for publication.

**Funding** This study was supported by China's National Development and Reform Commission Grant (No. 2018GFGW001) to Wei Zhang.

**Competing interests** None declared.

**Patient consent for publication** Not required.

**Ethics approval** China Health and Nutrition Survey (CHNS) was approved by the ethics committee of Carolina Population Center at the University of North Carolina at Chapel Hill and the NINH at the CCDC. Informed consent was obtained from all subjects before the investigation. The present study derived data from the public domain, and therefore ethics statement and informed consents were not applicable.

**Data availability statement** Data are available from China Health and Nutrition Survey (<https://www.cpc.unc.edu/projects/china/data/>).

#### **ORCID iD**

Wei Zhang <http://orcid.org/0000-0003-3113-9577>

#### **REFERENCES**

1. GBD 2017 Causes of Death Collaborators. Global, regional, and national age-sex-specific mortality for 282 causes of death in 195 countries and territories, 1980-2017: a systematic analysis for the Global Burden of Disease Study 2017. *Lancet* 2018; 392: 1736-88.
2. GBD 2017 Risk Factor Collaborators. Global, regional, and national comparative risk assessment of 84 behavioural, environmental and occupational, and metabolic risks or clusters of risks for 195 countries and territories, 1990-2017: a systematic analysis for the Global Burden of Disease Study 2017. *Lancet* 2018; 392: 1923-94.
3. Lloyd-Jones DM, Larson MG, Leip EP, *et al.* Lifetime risk for developing congestive heart failure: the Framingham Heart Study. *Circulation* 2002; 106: 3068-72.



4. Lewington S, Clarke R, Qizilbash N, *et al*. Age-specific relevance of usual blood pressure to vascular mortality: a meta-analysis of individual data for one million adults in 61 prospective studies. *Lancet* 2002; 360: 1903-13.
5. GBD 2017 DALYs and HALE Collaborators. Global, regional, and national disability-adjusted life-years (DALYs) for 359 diseases and injuries and healthy life expectancy (HALE) for 195 countries and territories, 1990-2017: a systematic analysis for the Global Burden of Disease Study 2017. *Lancet* 2018; 392: 1859-922.
6. Liew SJ, Lee JT, Tan CS, *et al*. Sociodemographic factors in relation to hypertension prevalence, awareness, treatment and control in a multi-ethnic Asian population\_ a cross sectional study. *BMJ Open* 2019; 9: e025869.
7. Cho SMJ, Lee H, Kim HC. Differences in prevalence of hypertension subtypes according to the 2018 Korean Society. *Clin Hypertens* 2019; 25: 26.
8. GBD 2017 Mortality Collaborators. Global, regional, and national age-sex-specific mortality and life expectancy, 1950-2017: a systematic analysis for the Global Burden of Disease Study 2017. *Lancet* 2018; 392: 1684-735.
9. Gong P, Liang S, Carlton EJ, *et al*. Urbanisation and health in China. *Lancet* 2012; 379: 843-52.
10. LeBlanc AG, Chaput JP. Urbanisation and fitness: worrying trends from China. *Lancet Child Adolesc Health* 2019; 3: 837-9.
11. Wang Z, Chen Z, Zhang L, *et al*. Status of Hypertension in China: Results From the China Hypertension Survey, 2012-2015. *Circulation* 2018; 137: 2344-56.
12. Omran AR. The epidemiologic transition: a theory of the epidemiology of population change. 1971. *Milbank Q* 2005; 83(4): 731-57.
13. Geiss LS, Wang J, Cheng YJ, *et al*. Prevalence and incidence trends for diagnosed diabetes among adults aged 20 to 79 years, United States, 1980-2012. *JAMA* 2014; 312: 1218-26.
14. Chen Z, Li SN, Wang X, *et al*. The incidence of hypertension, overweight, and obesity and relationship with cardiovascular events among middle-aged Chinese 6 years follow-up results. *Zhonghua Xin Xue Guan Bing Za Zhi*, 2020; 48: 47-53.
15. Liang Y, Liu R, Du S, *et al*. Trends in incidence of hypertension in Chinese adults, 1991-2009: the China Health and Nutrition Survey. *Int J Cardiol* 2014; 175: 96-101.
16. Sun S, Chen J, Johannesson M, *et al*. Regional differences in health status in China: population health-related quality of life results from the National Health Services Survey 2008. *Health Place* 2011; 17: 671-80.
17. Zhou M, Wang H, Zeng X, *et al*. Mortality, morbidity, and risk factors in China and its provinces, 1990-2017: a systematic analysis for the Global Burden of Disease Study 2017. *Lancet* 2019; 394: 1145-58.
18. Pan J, Shallcross D. Geographic distribution of hospital beds throughout China: a county-level econometric analysis. *Int J Equity Health* 2016; 15: 179.
19. Chen Y, Liang X, Zheng S, *et al*. Association of body fat mass and fat distribution with the incidence of hypertension in a population-based chinese cohort: a 22-year follow-up. *J Am Heart Assoc* 2018; 7: e007153.
20. Sun Z, Zheng L, Zhang X, *et al*. Ethnic differences in the incidence of hypertension among rural Chinese adults: results

from Liaoning Province. *PLoS One* 2014; 9: e86867.

21. Chen X, Liu Y, Sun X, *et al.* Comparison of body mass index, waist circumference, conicity index, and waist-to-height ratio for predicting incidence of hypertension: the rural Chinese cohort study. *J Hum Hypertens* 2018; 32: 228-35.

22. Popkin BM, Du S, Zhai F, *et al.* Cohort Profile: The China Health and Nutrition Survey--monitoring and understanding socio-economic and health change in China, 1989-2011. *Int J Epidemiol* 2010; 39: 1435-40.

23. Williams B, Mancia G. Ten Commandments of the 2018 ESC/ESH HTN Guidelines on Hypertension in Adults. *Eur Heart J* 2018; 39: 3007-8.

24. Qi SF, Zhang B, Wang HJ, *et al.* Joint effects of age and body mass index on the incidence of hypertension subtypes in the China Health and Nutrition Survey: a cohort study over 22years. *Prev Med* 2016; 89: 23-30.

25. Gao M, Kuang W, Qiu P, *et al.* The time trends of cognitive impairment incidence among older Chinese people in the community: based on the CLHLS cohorts from 1998 to 2014. *Age Ageing* 2017; 46: 787-93.

26. Lu J, Lu Y, Wang X, *et al.* Prevalence, awareness, treatment, and control of hypertension in China: data from 1.7 million adults in a population-based screening study (China PEACE Million Persons Project). *Lancet* 2017; 390: 2549-58.

27. Mendonça RD, Lopes AC, Pimenta AM, *et al.* Ultra-processed food consumption and the incidence of hypertension in a mediterranean cohort: The Seguimiento Universidad de Navarra Project. *Am J Hypertens* 2017; 30: 358-66.

28. Li M, McDermott R. Obesity, albuminuria, and gamma-glutamyl transferase predict incidence of hypertension in indigenous Australians in rural and remote communities in northern Australia. *J Hypertens* 2015; 33: 704-9; discussion 709-710.

29. Bernabe-Ortiz A, Sanchez JF, Carrillo-Larco RM, *et al.* Rural-to-urban migration and risk of hypertension: longitudinal results of the PERU MIGRANT study. *J Hum Hypertens* 2017; 31: 22-8.

30. Fan WG, Xie F, Wan YR, *et al.* The impact of changes in population blood pressure on hypertension prevalence and control in China. *J Clin Hypertens (Greenwich)* 2020; 22: 150-6.

31. He FJ, Li J, Macgregor GA. Effect of longer term modest salt reduction on blood pressure: Cochrane systematic review and meta-analysis of randomised trials. *BMJ* 2013; 346: f1325.

32. Gando Y, Sawada SS, Kawakami R, *et al.* Combined association of cardiorespiratory fitness and family history of hypertension on the incidence of hypertension: a long-term cohort study of Japanese males. *Hypertens Res* 2018; 41: 1063-9.

33. Bo Y, Guo C, Lin C, *et al.* Dynamic changes in long-term exposure to ambient particulate matter and incidence of hypertension in adults. *Hypertension* 2019; 74: 669-77.

34. Trudel X, Brisson C, Gilbert-Ouimet M, *et al.* Long working hours and the prevalence of masked and sustained hypertension. *Hypertension* 2020; 75: 532-8.

35. Li J, Shi L, Li S, *et al.* Urban-rural disparities in hypertension prevalence, detection, and medication use among Chinese Adults from 1993 to 2011. *Int J Equity Health* 2017, 16: 50.

36. Yu X, Zhang W. All-cause mortality rate in China: do residents in economically developed regions have better health? *Int J Equity Health* 2020, 19: 12.

- 1  
2  
3  
4  
5 37 Arici M, Turgan C, Altun B, *et al.* Hypertension incidence in Turkey (HinT): a population-based study. *J Hypertens* 2010;  
6 28: 240-4.  
7  
8 38 Feng XL, Pang M, Beard J. Health system strengthening and hypertension awareness, treatment and control: data from  
9 the China Health and Retirement Longitudinal Study. *Bull World Health Organ* 2014; 92: 29-41.  
10  
11 39 Kim BJ, Seo DC, Kim BS, *et al.* Relationship between cotinine-verified smoking status and incidence of hypertension in  
12 74,743 Korean adults. *Circ J* 2018; 82: 1659-65.  
13  
14 40 Gao K, Shi X, Wang W. The life-course impact of smoking on hypertension, myocardial infarction and respiratory  
15 diseases. *Sci Rep* 2017, 7: 4330.  
16  
17 41 Li G, Wang H, Wang K, *et al.* The association between smoking and blood pressure in men: a cross-sectional study. *BMC*  
18 *Public Health* 2017, 17: 797.  
19  
20 42 Kim Y, Sharp S, Hwang S, *et al.* Exercise and incidence of myocardial infarction, stroke, hypertension, type 2 diabetes  
21 and site-specific cancers: prospective cohort study of 257 854 adults in South Korea. *BMJ Open* 2019; 9: e025590.  
22  
23 43 Lu Y, Lu M, Dai H, *et al.* Lifestyle and risk of hypertension: follow-up of a young pre-hypertensive cohort. *Int J Med Sci*  
24 2015, 12: 605-12.  
25  
26 44 Jayawardana NWIA, Jayalath WATA, Madhujith WMT, *et al.* Aging and obesity are associated with undiagnosed  
27 hypertension in a cohort of males in the Central Province of Sri Lanka: a cross-sectional descriptive study. *BMC Cardiovasc*  
28 *Disord* 2017; 17: 165.  
29  
30 45 Sinnott SJ, Smeeth L, Williamson E, *et al.* Trends for prevalence and incidence of resistant hypertension: population  
31 based cohort study in the UK 1995-2015. *BMJ* 2017; 358: j3984.  
32  
33 46 Zhou W, Shi Y, Li YQ, *et al.* Body mass index, abdominal fatness, and hypertension incidence: a dose-response meta-  
34 analysis of prospective studies. *J Hum Hypertens* 2018; 32: 321-33.  
35  
36 47 Roerecke M, Kaczorowski J, Tobe SW, *et al.* The effect of a reduction in alcohol consumption on blood pressure: a  
37 systematic review and meta-analysis. *Lancet Public Health* 2017; 2: e108-20.  
38  
39 48 Whelton PK, Carey RM, Aronow WS, *et al.* 2017  
40 ACC/AHA/AAPA/ABC/ACPM/AGS/APhA/ASH/ASPC/NMA/PCNA Guideline for the Prevention, Detection, Evaluation,  
41 and Management of High Blood Pressure in Adults: Executive Summary: A Report of the American College of  
42 Cardiology/American Heart Association Task Force on Clinical Practice Guidelines. *Circulation* 2018; 138: e426-83.  
43  
44 49 Holmes MV, Dale CE, Zuccolo L, *et al.* Association between alcohol and cardiovascular disease: Mendelian  
45 randomisation analysis based on individual participant data. *BMJ* 2014; 349: g4164.  
46  
47  
48  
49  
50  
51  
52  
53  
54  
55  
56  
57  
58  
59  
60

# BMJ Open

## Long-term trends and regional variations of hypertension incidence in China: a dynamic prospective cohort study

|                                 |                                                                                                                                                                                                                                                                                                                                                 |
|---------------------------------|-------------------------------------------------------------------------------------------------------------------------------------------------------------------------------------------------------------------------------------------------------------------------------------------------------------------------------------------------|
| Journal:                        | <i>BMJ Open</i>                                                                                                                                                                                                                                                                                                                                 |
| Manuscript ID                   | bmjopen-2020-042053.R1                                                                                                                                                                                                                                                                                                                          |
| Article Type:                   | Original research                                                                                                                                                                                                                                                                                                                               |
| Date Submitted by the Author:   | 19-Oct-2020                                                                                                                                                                                                                                                                                                                                     |
| Complete List of Authors:       | Luo, Yunmei; Sichuan University West China Hospital<br>Xia, Fan; Sichuan University West China Hospital<br>Yu, Xuexin; Sichuan University West China Hospital<br>Li, Peiyi; Sichuan University West China Hospital<br>Huang, Wenzhi; Sichuan University West China Hospital, Department of Infection Control<br>Zhang, Wei; Sichuan University, |
| <b>Primary Subject Heading</b>: | Public health                                                                                                                                                                                                                                                                                                                                   |
| Secondary Subject Heading:      | Cardiovascular medicine, Epidemiology                                                                                                                                                                                                                                                                                                           |
| Keywords:                       | Hypertension < CARDIOLOGY, EPIDEMIOLOGY, PUBLIC HEALTH                                                                                                                                                                                                                                                                                          |
|                                 |                                                                                                                                                                                                                                                                                                                                                 |

SCHOLARONE™  
Manuscripts

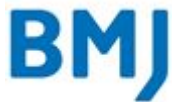

I, the Submitting Author has the right to grant and does grant on behalf of all authors of the Work (as defined in the below author licence), an exclusive licence and/or a non-exclusive licence for contributions from authors who are: i) UK Crown employees; ii) where BMJ has agreed a CC-BY licence shall apply, and/or iii) in accordance with the terms applicable for US Federal Government officers or employees acting as part of their official duties; on a worldwide, perpetual, irrevocable, royalty-free basis to BMJ Publishing Group Ltd ("BMJ") its licensees and where the relevant Journal is co-owned by BMJ to the co-owners of the Journal, to publish the Work in this journal and any other BMJ products and to exploit all rights, as set out in our [licence](#).

The Submitting Author accepts and understands that any supply made under these terms is made by BMJ to the Submitting Author unless you are acting as an employee on behalf of your employer or a postgraduate student of an affiliated institution which is paying any applicable article publishing charge ("APC") for Open Access articles. Where the Submitting Author wishes to make the Work available on an Open Access basis (and intends to pay the relevant APC), the terms of reuse of such Open Access shall be governed by a Creative Commons licence – details of these licences and which [Creative Commons](#) licence will apply to this Work are set out in our licence referred to above.

Other than as permitted in any relevant BMJ Author's Self Archiving Policies, I confirm this Work has not been accepted for publication elsewhere, is not being considered for publication elsewhere and does not duplicate material already published. I confirm all authors consent to publication of this Work and authorise the granting of this licence.

---

## 1 Title Page

2 **Title : Long-term trends and regional variations of hypertension incidence in China: a**  
3 **dynamic prospective cohort study**

4 Yun-Mei Luo,<sup>1,2</sup> Fan Xia,<sup>3</sup> Xue-Xin Yu,<sup>4</sup> Pei-Yi Li,<sup>1</sup> Wen-Zhi Huang,<sup>5</sup> Wei Zhang<sup>4</sup>

---

6 <sup>1</sup>Institute of Hospital Management, West China Hospital, Sichuan University, Chengdu, China

7 <sup>2</sup>West China Medical Publishers, West China Hospital, Sichuan University, Chengdu, China

8 <sup>3</sup>Department of Neurosurgery, West China Hospital, Sichuan University, Chengdu, China

9 <sup>4</sup>West China Biomedical Big Data Center, West China Hospital, Sichuan University, Chengdu, China

10 <sup>5</sup>Department of Infection Control, West China Hospital, Sichuan University, Chengdu, China

---

### 13 Correspondence to

14 Wei Zhang; weizhanghx@163.com

---

### 16 ABSTRACT

17 **Objective** The aim is to explore the trends of hypertension incidence and regional variations in China from  
18 1991 to 2015.

19 **Design** A dynamic prospective cohort study.

20 **Setting** China Health and Nutrition Survey (CHNS) 1991-2015.

---

21 **Participants** 12 952 Chinese adults aged 18+.

22 **Primary outcome measures** Incident hypertension from 1993 to 2015.

23 **Results** Age-standardized hypertension incidence increased from 40.8 per 1 000 person-years (95% CI,  
24 38.3 to 43.4) between 1993 and 1997 to 48.6 (95% CI, 46.1 to 51.0) between 2011 and 2015. The increasing  
25 trends were further supported by results from subsequent extended Cox proportional hazard model. In  
26 addition, results from the modelling analysis showed that individuals in Eastern, Central, and Northeastern  
27 China had greater risks of hypertension occurrence in comparison with their counterparts in Western China.

28 **Conclusion** Hypertension incidence increased during the study period. The growth called for more  
29 attention on the health education and health promotion of individuals with great risks.

---

### 31 **Strengths and limitations of this study**

32 ① The dynamic cohort study-design employed individuals from diverse social and geographic contexts,  
33 which enabled us to depict the long-term trends of hypertension incidence and regional disparities in the  
34 context of China's rapid social development and population aging.

35 ② According to the design of CHNS and the underestimation of self-reported data, we adopted both self-  
36 reported health outcomes and objective outcomes from physical tests, which to some extent avoided the  
37 recall bias and underestimation in underserved areas.

38 ③ We did not employ a national-representative sample and did not include individuals from all provinces in  
39 China, which undermined the representation of our findings. As a community-based survey, CHNS excluded  
40 institutionalized individuals, which further diminished the representation of our findings among Chinese.

1  
2  
3  
4  
5 41 ④Guidelines recommend to identify hypertension cases by using blood pressure values that are measured  
6  
7  
8 42 in different days, while individuals' blood pressure data in the CHNS were collected on the same day in the  
9  
10 43 CHNS, leading to unavoidable bias.

11  
12  
13  
14 44 ⑤In addition, we did not distinguish the grade of hypertension, and future research is necessary.

15  
16 45  
17  
18  
19  
20  
21  
22  
23  
24  
25  
26  
27  
28  
29  
30  
31  
32  
33  
34  
35  
36  
37  
38  
39  
40  
41  
42  
43  
44  
45  
46  
47  
48  
49  
50  
51  
52  
53  
54  
55  
56  
57  
58  
59  
60

For peer review only



---

## 46 INTRODUCTION

47 Along with aging population, non-communicable chronic diseases, particularly stroke and ischemic heart  
48 disease, have led to great burden of disease, deaths, and years of life lost (YLLs) in both developed and  
49 developing countries.<sup>1 2</sup> Connected closely with various cardiovascular diseases,<sup>3 4</sup> high systolic blood  
50 pressure was ranked as the leading risk factor of risk-attributable disability-adjusted life-years (DALYs)  
51 among selected 195 countries and territories.<sup>5</sup> For instance, high systolic blood pressure accounted for 2.54  
52 million deaths and more than 5% of DALYs in China in 2017.<sup>6</sup>

53 Existing evidence has confirmed a worldwide high prevalence of hypertension.<sup>4-6</sup> Countries, such as  
54 Singapore<sup>6</sup> and Korea<sup>7</sup>, had a significant proportion of individuals with hypertension. Likewise, with the  
55 extended life expectancy,<sup>8</sup> changes in lifestyle behaviors,<sup>9</sup> and rapid urbanization,<sup>10</sup> developing countries,  
56 such as China, experienced a substantial increase in the prevalence of hypertension, ranging from 13.6% in  
57 1991 to 27.9% in 2015.<sup>11</sup>

58 Although the increasing prevalence of hypertension provided critical information for public health practice  
59 and disease control programs, it could not accurately depict the epidemiologic transition as the incidence  
60 measure.<sup>12</sup> Prior studies have indicated that the increasing prevalence could coexist with the decreasing  
61 incidence in the context of healthy aging.<sup>13</sup> For evidence-based health-promoting initiatives, empirical  
62 research on hypertension incidence is warranted.

63 However, research on the long-term trends of the incidence of hypertension from China is scare and  
64 relatively outdated.<sup>14 15</sup> This is an important knowledge gap because developing countries are experiencing  
65 unprecedented social development. Up-to-date information among developing countries could greatly

1  
2  
3  
4  
5 66 contribute to depict global epidemiologic transitions. Moreover, regional disparities are a major health  
6  
7  
8 67 concern in China as a result of inequitable socio-economic development and health care resource  
9  
10 68 distribution,<sup>16-18</sup> while the existing research provides insufficient information regarding the regional  
11  
12  
13 69 disparities in the hypertension incidence.<sup>19-21</sup>

14  
15  
16 70 Hence, this study aims to explore the long-term trends of hypertension incidence among Chinese from  
17  
18 71 diverse social and geographic contexts. In addition, we are particularly interested in regional variations while  
19  
20  
21 72 taking the individual-level risk factors into account.

## 22 23 24 25 73 **METHODS**

### 26 27 28 74 **Data source**

29  
30  
31 75 The present study derived data from the China Health and Nutrition Survey (CHNS). CHNS has been  
32  
33 76 collaboratively conducted by Carolina Population Center at the University of North Carolina at Chapel Hill  
34  
35 77 and the National Institute for Nutrition and Health (NINH, former National Institute of Nutrition and Food  
36  
37 78 Safety) at the Chinese Center for Disease Control and Prevention. Initiated in 1989, CHNS consisted of ten-  
38  
39  
40  
41 79 wave data in 1989, 1991, 1993, 1997, 2000, 2004, 2006, 2009, 2011, and 2015, respectively. Overall, CHNS  
42  
43  
44 80 employed a multistage random cluster method to draw the study sample, which included over 30 000  
45  
46  
47 81 individuals from three provincial-level cities and twelve provinces. Individuals in the survey came from  
48  
49  
50 82 diverse social, geographic, and cultural contexts. CHNS employed face-to-face questionnaire interviews to  
51  
52  
53 83 collect data, and the physical health examinations were conducted by well-trained investigators. Information  
54  
55 84 regarding survey design, data collection, and quality control could be retrieved from the cohort profile.<sup>22</sup>

### 56 57 58 85 **Study design and exclusion criteria**

59  
60

1  
2  
3  
4  
5 86 The present study employed a dynamic cohort study-design as not all individuals entered the cohort at the  
6  
7  
8 87 same time. To evaluate the long-term trends of hypertension incidence, we excluded individuals (a) without  
9  
10  
11 88 individual ID and community ID; (b) aged under 18 because of the low incidence of hypertension among  
12  
13  
14 89 children and teenagers; (c) with hypertension in his/her first investigation; (d) with only one observation or  
15  
16 90 only one record of hypertension status; and (e) were pregnant during the study period to exclude gestational  
17  
18  
19 91 hypertension. Furthermore, we excluded observations after the diagnosis of hypertension (figure 1).

## 92 **Exposures**

93 The primary exposure variable of this study were the timing of entering the cohort and geographic regions.  
94 For modeling analyses, it was not feasible to treat the waves as continuous variables, and therefore we  
95 respectively grouped the individuals entering the cohort from (a) 1991, 1993, and 1997; (b) 2000, 2004,  
96 2006, and 2009; and (c) 2011 and 2015. In this case, two dummies were introduced in the model with  
97 individuals from 1991 to 1997 as the reference group.

98 Geographic regions were defined according to the bulletin of the National Bureau of Statistics of China.  
99 Specifically, we grouped individuals from (a) Beijing, Shanghai, Jiangsu Province, Zhejiang Province, and  
100 Shandong Province as Eastern China; (b) Henan Province, Hubei Province, and Hunan Province as Central  
101 China; (c) Liaoning Province and Heilongjiang Province as Northeastern China; and (d) Yunnan Province,  
102 Guangxi Zhuang Autonomous Region, Guizhou Province, Chongqing, and Shanxi Province as Western  
103 China.

## 104 **Outcomes**

105 We included incidence of hypertension as the primary outcome. First, we adopted self-reported hypertension,

1  
2  
3  
4  
5 106 which was derived from the answer to the question, “Has a doctor ever told you that you had high blood  
6  
7  
8 107 pressure?”. If individuals self-reported no hypertension history, the outcomes would be further supplemented  
9  
10  
11 108 by the blood pressure tests to avoid the recall bias and underestimation from self-reported measures.  
12  
13 109 According to the criteria of the 2018 Clinical Guideline in China and the 2018 ESC/ESH HTN Guideline,<sup>23</sup>  
14  
15  
16 110 hypertension was confirmed with the systolic blood pressure (SBP)≥140 mmHg or with the diastolic blood  
17  
18 111 pressure (DBP)≥90 mmHg. To guarantee the accuracy of the tests, the blood pressure was detected in  
19  
20  
21 112 triplicate by professional health workers on the same day.

### 113 **Covariates**

22  
23  
24  
25  
26  
27 114 To adjust for variations in baseline characteristics, we introduced several confounding factors that may  
28  
29  
30 115 influence the occurrence of hypertension. These factors included urban vs. rural settings, sociodemographic  
31  
32  
33 116 characteristics (age, sex, race, marital status, educational attainment, and employment status), and lifestyle  
34  
35 117 attributes (BMI, smoking behaviors, alcohol consumption, and physical activity).<sup>15 24</sup>

### 118 **Statistical analysis**

36  
37  
38  
39  
40  
41  
42 119 First, we performed chi-square tests and Kruskal-Wallis rank-sum tests to evaluate variations in baseline  
43  
44 120 characteristics over time. Second, we calculated the crude incidence of hypertension as below:<sup>25</sup>

$$121 \quad \text{Incidence} = \frac{\text{number of new hypertension cases}}{\text{total person – years at risk}}$$

45  
46  
47  
48  
49  
50  
51 122 The ‘person-years at risk’ is the period from the first hypertension-free year to the year when the subsequent  
52  
53 123 hypertension is confirmed. In addition, we conducted direct standardization to calculate the age-standardized  
54  
55  
56 124 incidence of hypertension by using the study sample from wave 2011 and wave 2015 as the standard  
57  
58  
59  
60

1  
2  
3  
4  
5 125 population. Subgroup analyses were conducted by sex.  
6  
7

8  
9 126 To further evaluate the long-term trends and geographic variations of incident hypertension, we performed  
10  
11 127 an extended Cox proportional hazard model while including all covariates to control for baseline variations.  
12  
13  
14 128 Because the effect of age didn't conform to the proportional hazard assumption, we performed a time-  
15  
16 129 dependent Cox regression model with age as a time-dependent variable. As for sensitivity analyses, we  
17  
18  
19 130 construct the multi-level Poisson regression indicating similar findings.  
20  
21

22 131 Data analyses were performed with Stata 15.0 (StataCorp, TX, USA). A two-tailed *P* value of less than 0.05  
23  
24  
25 132 was considered statistical significance.  
26  
27

### 28 133 **Patient and public involvement**

29  
30  
31 134 Not applicable. Data are derived from public domain.  
32  
33

## 34 135 **RESULTS**

### 36 37 38 136 **Study population**

39  
40  
41 137 The CHNS consisted of data of 38 558 individuals with 143 586 observations from 1989 and 2015, and the  
42  
43  
44 138 present study only included 12 952 individuals from 1991 to 2015 after sample selection (figure 1). Table 1  
45  
46 139 presents the distribution of observations from included individuals during the study period. For example, 5  
47  
48  
49 140 938 individuals entered the cohort in 1991, with only 912 followed-up in 2015 (table 1). Among the 12 952  
50  
51 141 participants, 5 119 of them developed hypertension during the follow-up period.  
52  
53

54 142  
55  
56  
57  
58  
59  
60

1  
2  
3  
4  
5 143 **Table 1** Observation distribution of study sample from 1991 to 2015

| Wave | 1991 | 1993 | 1997 | 2000 | 2004 | 2006 | 2009 | 2011 | 2015 |
|------|------|------|------|------|------|------|------|------|------|
| 1989 |      |      |      |      |      |      |      |      |      |
| 1991 | 5938 |      |      |      |      |      |      |      |      |
| 1993 | 5166 | 677  |      |      |      |      |      |      |      |
| 1997 | 3313 | 485  | 1691 |      |      |      |      |      |      |
| 2000 | 2658 | 335  | 1451 | 1009 |      |      |      |      |      |
| 2004 | 2050 | 234  | 1037 | 813  | 837  |      |      |      |      |
| 2006 | 1722 | 188  | 865  | 642  | 684  | 376  |      |      |      |
| 2009 | 1378 | 142  | 385  | 398  | 413  | 302  | 692  |      |      |
| 2011 | 1200 | 114  | 329  | 335  | 359  | 216  | 630  | 1732 |      |
| 2015 | 912  | 86   | 250  | 236  | 231  | 152  | 353  | 1732 | 0    |

144

145 Table 2 presents the baseline characteristics of the study sample. Overall, variations existed in all baseline  
146 characteristics. Newly recruited individuals were older ( $P < 0.001$ ) and well-educated ( $P < 0.001$ ). They  
147 were more likely to be obese ( $P < 0.001$ ), Han ( $P < 0.001$ ), and male ( $P < 0.001$ ), and they were less likely  
148 to be smokers ( $P < 0.001$ ), employed ( $P < 0.001$ ), and physically active ( $P < 0.001$ ).

149

150 **Table 2** Baseline characteristics of study individuals, *n*(%)\*

| Characteristic           | Time entering the cohort |              |              | <i>P</i> value |
|--------------------------|--------------------------|--------------|--------------|----------------|
|                          | 1991-1997                | 2000-2009    | 2011-2015    |                |
| Region                   |                          |              |              |                |
| Western                  | 2256 (27.16)             | 611 (20.97)  | 523 (30.20)  | <0.001         |
| Central                  | 2817 (33.92)             | 800 (27.45)  | 85 (4.91)    |                |
| Northeastern             | 1288 (15.51)             | 794 (27.25)  | 83 (4.79)    |                |
| Eastern                  | 1945 (23.42)             | 709 (24.33)  | 1041 (60.10) |                |
| Urban-rural              |                          |              |              |                |
| Rural                    | 5616 (67.61)             | 1717 (58.92) | 777 (44.86)  | <0.001         |
| Urban                    | 2690 (32.39)             | 1197 (41.08) | 955 (55.14)  |                |
| Age (years)              |                          |              |              |                |
| 18-29                    | 2374 (28.58)             | 695 (23.85)  | 221 (12.76)  | <0.001         |
| 30-39                    | 2382 (28.68)             | 854 (29.31)  | 345 (19.92)  |                |
| 40-49                    | 1752 (21.09)             | 621 (21.31)  | 424 (24.48)  |                |
| 50-59                    | 1004 (12.09)             | 405 (13.90)  | 456 (26.33)  |                |
| ≥60                      | 794 (9.56)               | 339 (11.63)  | 286 (16.51)  |                |
| Sex                      |                          |              |              |                |
| Male                     | 3986 (47.99)             | 1168 (40.08) | 736 (42.49)  | <0.001         |
| Female                   | 4320 (52.01)             | 1746 (59.92) | 996 (57.51)  |                |
| BMI (kg/m <sup>2</sup> ) |                          |              |              |                |
| <18.5                    | 763 (9.27)               | 191 (6.60)   | 60 (3.46)    | <0.001         |
| 18.5-23.9                | 6012 (73.07)             | 1776 (61.35) | 955 (55.14)  |                |
| 24.0-27.9                | 1238 (15.05)             | 760 (26.25)  | 545 (31.47)  |                |
| ≥28                      | 215 (2.61)               | 168 (5.80)   | 172 (9.93)   |                |
| Race                     |                          |              |              |                |
| Other                    | 1038 (12.59)             | 340 (11.69)  | 72 (4.17)    | <0.001         |
| Han                      | 7204 (87.41)             | 2568 (88.31) | 1656 (95.83) |                |
| Marital status           |                          |              |              |                |

|                                   |              |              |              |        |
|-----------------------------------|--------------|--------------|--------------|--------|
| Other                             | 1183 (14.29) | 341 (11.82)  | 192 (11.14)  | <0.001 |
| Married                           | 7098 (85.71) | 2545 (88.18) | 1531 (88.86) |        |
| Education attainment              |              |              |              |        |
| Primary school and below          | 4416 (53.81) | 741 (26.43)  | 410 (23.73)  | <0.001 |
| Middle school                     | 2377 (28.97) | 1103 (39.34) | 457 (26.45)  |        |
| High school or equivalent         | 1240 (15.11) | 742 (26.46)  | 472 (27.31)  |        |
| College and above                 | 173 (2.11)   | 218 (7.77)   | 389 (22.51)  |        |
| Employed                          |              |              |              |        |
| No                                | 1145 (13.85) | 1044 (35.95) | 716 (41.34)  | <0.001 |
| Yes                               | 7121 (86.15) | 1860 (64.05) | 1016 (58.66) |        |
| Smoking history                   |              |              |              |        |
| Never or smoking cessation        | 5300 (64.72) | 2163 (74.97) | 1326 (77.18) | <0.001 |
| Current smoker, cigarettes < 20/d | 1481 (18.09) | 370 (12.82)  | 205 (11.93)  |        |
| Current smoker, cigarettes ≥ 20/d | 1408 (17.19) | 352 (12.20)  | 187 (10.88)  |        |
| Alcohol consumption               |              |              |              |        |
| Never                             | 5042 (61.82) | 2037 (70.93) | 1116 (65.03) | <0.001 |
| Not more than once per month      | 469 (5.75)   | 102 (3.55)   | 144 (8.39)   |        |
| 1-3 times per month               | 661 (8.10)   | 173 (6.02)   | 127 (7.40)   |        |
| 1-2 times per week                | 781 (9.58)   | 227 (7.90)   | 127 (7.40)   |        |
| 3-4 times per week                | 450 (5.52)   | 126 (4.39)   | 64 (3.73)    |        |
| On a daily basis                  | 753 (9.23)   | 207 (7.21)   | 138 (8.04)   |        |
| Physical activity                 |              |              |              |        |
| Very light                        | 997 (12.56)  | 780 (27.73)  | 823 (49.46)  | <0.001 |
| Light                             | 1307 (16.46) | 799 (28.40)  | 453 (27.22)  |        |
| Moderate                          | 1291 (16.26) | 461 (16.39)  | 209 (12.56)  |        |
| Heavy or very heavy               | 4344 (54.71) | 773 (27.48)  | 179 (10.76)  |        |

151 \*Overall, we included 11 685 individuals in the modelling analyses after excluding 97 individuals without

152 BMI, 74 without race, 62 without marital status, 214 without educational attainment, 50 without employment



1  
2  
3  
4  
5 153 status, 160 without smoking history, 208 without alcohol consumption, and 449 without physical activity.

6  
7  
8 154 (Missing rate 9.78 %)

9  
10  
11 155

12  
13  
14 156 **Crude and age-standardized incidence**

15  
16  
17  
18 157 Table 3 presents the crude and age-standardized hypertension incidence during the study period. For the

19  
20 158 calculation of hypertension incidence, we employed the full sample of 12 952 individuals with 53 703

21  
22  
23 159 observations. The age-standardized incidence of hypertension witnessed a significant increase, ranging from

24  
25 160 40.8 per 1 000 person-years (95% CI: 38.3 to 43.4) between 1993 and 1997 to 48.6 per 1 000 person-years

26  
27  
28 161 (95% CI: 46.1 to 51.0) between 2011 and 2015. The increasing pattern was also exhibited among men (1993-

29  
30 162 1997: 46.2, 95% CI: 42.1 to 50.4; 2011-2015: 55.7, 95% CI: 51.7 to 59.7) and women (1993-1997: 36.5,

31  
32  
33 163 95% CI: 33.2 to 39.7; 2011-2015: 43.3, 95% CI: 40.2 to 46.3).

34  
35  
36 164

165 **Table 3** Crude and age-standardized incidence over time, per 1000 person-years

| Incidence                             | 1991 | 1993-1997        | 2000-2009        | 2011-2015        |
|---------------------------------------|------|------------------|------------------|------------------|
| Total                                 |      |                  |                  |                  |
| Case (person-year)                    | -    | 1114 (35486)     | 2571 (70575)     | 1434 (29492)     |
| Crude incidence (95% CI)              | -    | 31.3 (29.6-33.2) | 36.4 (35.0-37.8) | 48.6 (46.1-51.2) |
| Age-standardized incidence (95% CI) * | -    | 40.8 (38.3-43.4) | 41.5 (39.9-43.2) | 48.6 (46.1-51.0) |
| Male                                  |      |                  |                  |                  |
| Case (person-year)                    | -    | 594 (17530)      | 1292 (32524)     | 699 (12532)      |
| Crude incidence (95% CI)              | -    | 33.8 (31.2-36.7) | 39.7 (37.6-41.9) | 55.7 (51.7-60.0) |
| Age-standardized incidence (95% CI) * | -    | 46.2 (42.1-50.4) | 45.7 (43.0-48.3) | 55.7 (51.7-59.7) |
| Female                                |      |                  |                  |                  |
| Case (person-year)                    | -    | 520 (17956)      | 1279 (38051)     | 735 (16960)      |
| Crude incidence (95% CI)              | -    | 28.9 (26.5-31.5) | 33.6 (31.8-35.5) | 43.3 (40.3-46.5) |
| Age-standardized incidence (95% CI) * | -    | 36.5 (33.2-39.7) | 38.0 (35.9-40.1) | 43.3 (40.2-46.3) |

166 \* Age-standardized incidence was calculated using the study sample in 2011-2015 as the standard population.

167

### 168 **Extended Cox proportional hazard analysis**

169 For the modeling analysis, we included 11 685 individuals without missing data (missing rate, 9.78%).

170 Among the identified cases, the duration from free of hypertension to incident hypertension ranged from 2

171 to 24 years, with a median of 9 years.

172 Table 4 presents results from extended Cox proportional hazard analysis while taking variations in baseline

173 characteristics into account. First, the increasing trends of hypertension incidence were robust, as suggested

174 by the modeling results. Specifically, individuals entering the cohort from 2000 to 2009 (aHR = 1.10, 95%

175 CI: 1.01 to 1.21) and those from 2011 to 2015 (aHR = 1.19, 95% CI: 1.04 to 1.37) had a higher risk of

1  
2  
3  
4  
5 176 hypertension in comparison with individuals entering the cohort from 1991 to 1997. With reference to  
6  
7  
8 177 regional variations, individuals in Central (aHR = 1.26, 95% CI: 1.16 to 1.37), Northeastern (aHR = 1.56,  
9  
10 178 95% CI: 1.41 to 1.72), and Eastern China (aHR = 1.48, 95% CI: 1.36 to 1.63) respectively had a higher risk  
11  
12  
13 179 of hypertension occurrence relative to their counterparts in Western China.  
14  
15  
16 180

For peer review only

181 **Table 4** Extended Cox proportional hazard analysis of hypertension incidence

| Characteristic                | aHR (95% CI)      | P value |
|-------------------------------|-------------------|---------|
| Timing of entering the cohort |                   |         |
| 1991-1997                     | Ref.              |         |
| 2000-2009                     | 1.10 (1.01-1.21)  | 0.025   |
| 2011-2015                     | 1.19 (1.04-1.37)  | 0.010   |
| Geographic region             |                   |         |
| Western                       | Ref.              |         |
| Central                       | 1.26 (1.16-1.37)  | <0.001  |
| Northeastern                  | 1.56 (1.41-1.72)  | <0.001  |
| Eastern                       | 1.48 (1.36-1.63)  | <0.001  |
| Urban (vs. rural)             | 0.94 (0.88-1.01)  | 0.109   |
| Age*                          |                   |         |
| 18-29                         | Ref.              |         |
| 30-39                         | 1.93 (1.41-2.65)  | <0.001  |
| 40-49                         | 3.99 (2.93-5.43)  | <0.001  |
| 50-59                         | 5.16 (3.74-7.12)  | <0.001  |
| ≥60                           | 9.11 (6.50-12.77) | <0.001  |
| Female (vs. male)             | 0.81 (0.74-0.88)  | <0.001  |
| BMI (kg/m <sup>2</sup> )      |                   |         |
| <18.5                         | Ref.              |         |
| 18.5-23.9                     | 1.31 (1.16-1.48)  | <0.001  |
| 24.0-27.9                     | 2.07 (1.81-2.36)  | <0.001  |
| ≥28                           | 2.82 (2.37-3.34)  | <0.001  |
| Race (Han vs. others)         | 1.11 (1.01-1.23)  | 0.032   |
| Married (vs. others)          | 0.92 (0.83-1.02)  | 0.149   |
| Educational attainment        |                   |         |
| Primary school and below      | Ref.              |         |
| Middle school                 | 0.91 (0.84-0.99)  | 0.020   |

|                                        |                  |       |
|----------------------------------------|------------------|-------|
| High school or equivalent              | 0.86 (0.77-0.95) | 0.002 |
| College and above                      | 0.82 (0.68-0.98) | 0.033 |
| Employed (yes vs. no)                  | 0.90 (0.82-0.99) | 0.036 |
| Smoking                                |                  |       |
| Never or smoking cessation             | Ref.             |       |
| Current smoker, cigarettes < 20/d      | 0.98 (0.89-1.07) | 0.752 |
| Current smoker, cigarettes $\geq$ 20/d | 1.05 (0.96-1.16) | 0.237 |
| Alcohol consumption                    |                  |       |
| never                                  | Ref.             |       |
| Not more than once per month           | 0.89 (0.78-1.03) | 0.125 |
| 1–3 times per month                    | 1.17 (1.04-1.32) | 0.006 |
| 1–2 times per week                     | 1.00 (0.89-1.12) | 0.963 |
| 3–4 times per week                     | 1.05 (0.92-1.21) | 0.412 |
| On a daily basis                       | 1.18 (1.06-1.31) | 0.002 |
| Physical activity                      |                  |       |
| very light                             | Ref.             |       |
| light                                  | 0.92 (0.83-1.02) | 0.154 |
| moderate                               | 0.99 (0.88-1.11) | 0.930 |
| heavy and very                         | 0.91 (0.82-1.02) | 0.118 |

182 \*Estimated time effect of age,  $P < 0.001$

183

184 In addition, there existed no urban-rural differences in developing hypertension (Table 4). Risks of incident  
 185 hypertension increased with age, BMI, and alcohol consumption, while it was negatively associated with  
 186 educational attainment. Women had a lower risk of incident hypertension compared with men (aHR = 0.81,  
 187 95% CI: 0.74 to 0.88). Relative to those without a job, employees had a lower risk of developing hypertension  
 188 (aHR = 0.90, 95% CI: 0.82 to 0.99). Han individuals were significantly associated with a higher risk (aHR =

1  
2  
3  
4  
5 189 1.11, 95% CI: 1.01 to 1.23) relative to the minority.  
6  
7

8  
9 **DISCUSSION**

10  
11  
12 191 By employing a study sample of 12 925 individuals from diverse social and geographic contexts, we found  
13  
14 192 the age-standardized incidence of hypertension increased during the study period. The increasing pattern  
15  
16  
17 193 remained even after controlling for variations in baseline characteristics. Furthermore, we found that  
18  
19  
20 194 individuals in economically developed Eastern, Central, and Northeastern China had greater risks of incident  
21  
22 195 hypertension in comparison with those in Western China.

23  
24  
25 196 Instead of focusing on the incidence measure, the vast majority of prior studies focused on the prevalence  
26  
27  
28 197 measure. For example, one of the previous studies in China indicated that the prevalence of hypertension  
29  
30  
31 198 rose substantially from 13.6% in 1991 to 27.9% in 2015.<sup>11</sup> The findings were further supplemented by results  
32  
33  
34 199 from Lu *et al.* (2017), which suggested a higher prevalence of hypertension among those aged between 35  
35  
36 200 and 75 years old (44.7%).<sup>26</sup> Compared with these earlier studies, our focus on the incidence measure  
37  
38  
39 201 provided a more accurate reflection of the epidemiologic transition of hypertension in China.<sup>12</sup> Our findings  
40  
41  
42 202 updated the trends of hypertension incidence in comparison with that from Liang *et al.* (2014), which  
43  
44 203 indicated a similar pattern from 1991 to 2009.<sup>15</sup> Even though hypertension incidence appeared to vary across  
45  
46 204 countries,<sup>27-29</sup> the comparison is untenable because we adopted different standard populations. Further  
47  
48  
49 205 empirical research across countries is warranted.

50  
51  
52 206 With the rapid economic development, people often change their dietary patterns from light diet to high salt  
53  
54  
55 207 and fat diet along with a secondary lifestyle.<sup>30</sup> These changes would significantly impact the prevalence and  
56  
57  
58 208 control of hypertension in China.<sup>30</sup> In addition, due to data limitation, we were unable to introduce several  
59  
60

1  
2  
3  
4  
5 209 potential risks factors, such as sodium intake or dietary pattern, parental history, psychological status,  
6  
7  
8 210 ambient air pollutants, working hours, and household income.<sup>31-34</sup> These factors may explain the residual  
9  
10 211 time-effects in the model.

12  
13  
14 212 Although existing evidence on the regional disparities of hypertension incidence is scant, prior research  
15  
16 213 indicates that Central, Northeastern, and Eastern China had a higher prevalence of hypertension compared  
17  
18 214 with Western China,<sup>35</sup> which is in line with our findings. In sharp contrast, prior investigators have noted  
19  
20 215 that Northeastern and Central China had lower all-cause mortality rates relative to Western China.<sup>36</sup> These  
21  
22 216 findings appear to suggest that individuals in China's economically developed regions are experiencing  
23  
24 217 extended life expectancy with relatively unhealthy aging.<sup>12</sup> However, one should be aware of the possibility  
25  
26 218 that although individuals in Western China had lower risks of hypertension compared with the other three  
27  
28 219 regions, local public awareness and timely treatment could be a challenging issue.

29  
30  
31  
32  
33  
34  
35 220 Differed from previous studies,<sup>15 37</sup> no urban-rural disparities were observed in the present study. This may  
36  
37 221 be a result of the narrowing gap of lifestyle between rural and urban residents. With the rapid economic  
38  
39 222 development and urbanization in the past few decades, the lifestyle and dietary pattern of rural residents are  
40  
41 223 approaching to those of their counterparts in urban China.<sup>9 10</sup> This possibility has been further supported by  
42  
43 224 the fact that the prevalence of hypertension in rural China exceeded that of urban China in 2015.<sup>26</sup> Taking  
44  
45 225 into account the lower treatment rate and insufficient awareness among rural residents,<sup>38</sup> one should direct  
46  
47 226 more attention to rural China.

48  
49  
50  
51  
52  
53  
54 227 Moreover, we found that smoking history was not associated with incident hypertension. The effect of  
55  
56 228 smoking on the development of the chronic disease is unclear and appears to differ across life courses.<sup>39-41</sup>  
57  
58  
59  
60

229 Prior research based on Korean has found a J-shaped association between physical activity and incident  
230 hypertension,<sup>42</sup> while the present study on Chinese did not observe a similar association, which is in line  
231 with findings based on Japanese.<sup>43</sup> The effect of physical activity on the development of hypertension seems  
232 to be controversial and varies across countries. Further analyses are warranted.

233 Consistent with the previous studies,<sup>44-47</sup> several risk factors, including age, gender, educational attainment,  
234 race, alcohol consumption, and BMI, were confirmed by our analyses. The growing incidence of  
235 hypertension emphasizes the early prevention, education, detection, and management for hypertension.<sup>48</sup>  
236 Mentoring aforementioned lifestyle behaviors, such as alcohol consumption, may be helpful to constrain the  
237 hypertension incidence.<sup>49</sup> Public health and lifestyle interventions targeting high-risk individuals, such as  
238 older adults, men, and obese population, hold promise.

### 239 **Conclusion**

240 Hypertension incidence increased during the study period. Individuals in Eastern, Central, and Northeastern  
241 China had greater risks of hypertension in comparison with their counterparts in Western China. Risks of  
242 incident hypertension increased with age, BMI, and alcohol consumption, but negatively associated with  
243 educational attainment. The growth of hypertension incidence calls for more attention on the health  
244 education and health promotion of individuals with great risks.

### 245 **Strengths and limitations of this study**

246 The present study has two major strengths. First, the dynamic cohort study-design employed individuals  
247 from diverse social and geographic contexts, which enabled us to depict the long-term trends of hypertension  
248 incidence and regional disparities in the context of China's rapid social development and population aging.



249 In addition, we adopted both self-reported health outcomes and objective outcomes from physical tests,  
250 which avoided the recall bias and underestimation in underserved areas.

251 Nevertheless, this study is subject to several limitations. First, we did not employ a national-representative  
252 sample and did not include individuals from all provinces in China, which undermined the representation of  
253 our findings. As a community-based survey, the CHNS excluded institutionalized individuals, which further  
254 diminished the representation of our findings among Chinese. Third, 2018 Clinical Guideline in China  
255 recommend to identify hypertension cases by using blood pressure values that are measured in different  
256 days<sup>23</sup>, while individuals' blood pressure data in the CHNS were collected on the same day in the CHNS,  
257 leading to unavoidable bias. Last, we did not distinguish the grade of hypertension, and future research is  
258 necessary.

259  
**Acknowledgments** We thank the National Institute for Nutrition and Health, China Center for Disease Control and  
260 Prevention, Carolina Population Center at(P2C HD050924, T32 HD007168), the University of North Carolina at Chapel Hill,  
261 the NIH (R01-HD30880, DK056350, R24 HD050924, and R01-HD38700) and the NIH Fogarty International Center (D43  
262 TW009077, D43 TW007709) for financial support for the CHNS data collection and analysis files from 1989 to 2015 and  
263 future surveys, and the China-Japan Friendship Hospital, Ministry of Health for support for CHNS 2009, Chinese National  
264 Human Genome Center at Shanghai since 2009, and Beijing Municipal Center for Disease Prevention and Control since 2011.

265  
**Contributors** WZ designed this study and revised the manuscript. Y-ML, FX, and X-XY performed data clean, statistical  
266 analysis, and wrote the first draft of the manuscript, which P-YL and W-ZH subsequently revised. All authors read the article  
267 and approve it for publication.

269 **Funding** This study was supported by China's National Development and Reform Commission Grant (No. 2018GFGW001)  
270 to Wei Zhang.

271 **Competing interests** None declared.

272 **Patient consent for publication** Not required.

273 **Ethics approval** China Health and Nutrition Survey (CHNS) was approved by the ethics committee of Carolina Population  
274 Center at the University of North Carolina at Chapel Hill and the NINH at the CCDC. Informed consent was obtained from  
275 all subjects before the investigation. The present study derived data from the public domain, and therefore ethics statement  
276 and informed consents were not applicable.

277 **Data availability statement** Data are available from China Health and Nutrition Survey  
278 (<https://www.cpc.unc.edu/projects/china/data/>).

279 **ORCID iD**

280 Wei Zhang <http://orcid.org/0000-0003-3113-9577>

281

282 **REFERENCES**

- 283 1. GBD 2017 Causes of Death Collaborators. Global, regional, and national age-sex-specific mortality for 282 causes of  
284 death in 195 countries and territories, 1980-2017: a systematic analysis for the Global Burden of Disease Study 2017. *Lancet*  
285 2018; 392: 1736-88.
- 286 2. GBD 2017 Risk Factor Collaborators. Global, regional, and national comparative risk assessment of 84 behavioural,  
287 environmental and occupational, and metabolic risks or clusters of risks for 195 countries and territories, 1990-2017: a  
288 systematic analysis for the Global Burden of Disease Study 2017. *Lancet* 2018; 392: 1923-94.
- 289 3. Lloyd-Jones DM, Larson MG, Leip EP, *et al.* Lifetime risk for developing congestive heart failure: the Framingham Heart  
290 Study. *Circulation* 2002; 106: 3068-72.
- 291 4. Lewington S, Clarke R, Qizilbash N, *et al.* Age-specific relevance of usual blood pressure to vascular mortality: a meta-  
292 analysis of individual data for one million adults in 61 prospective studies. *Lancet* 2002; 360: 1903-13.
- 293 5. GBD 2017 DALYs and HALE Collaborators. Global, regional, and national disability-adjusted life-years (DALYs) for  
294 359 diseases and injuries and healthy life expectancy (HALE) for 195 countries and territories, 1990-2017: a systematic

- analysis for the Global Burden of Disease Study 2017. *Lancet* 2018; 392: 1859-922.
6. Liew SJ, Lee JT, Tan CS, *et al*. Sociodemographic factors in relation to hypertension prevalence, awareness, treatment and control in a multi-ethnic Asian population\_ a cross sectional study. *BMJ Open* 2019; 9: e025869.
7. Cho SMJ, Lee H, Kim HC. Differences in prevalence of hypertension subtypes according to the 2018 Korean Society. *Clin Hypertens* 2019; 25: 26.
8. GBD 2017 Mortality Collaborators. Global, regional, and national age-sex-specific mortality and life expectancy, 1950-2017: a systematic analysis for the Global Burden of Disease Study 2017. *Lancet* 2018; 392: 1684-735.
9. Gong P, Liang S, Carlton EJ, *et al*. Urbanisation and health in China. *Lancet* 2012; 379: 843-52.
10. LeBlanc AG, Chaput JP. Urbanisation and fitness: worrying trends from China. *Lancet Child Adolesc Health* 2019; 3: 837-9.
11. Wang Z, Chen Z, Zhang L, *et al*. Status of Hypertension in China: Results From the China Hypertension Survey, 2012-2015. *Circulation* 2018; 137: 2344-56.
12. Omran AR. The epidemiologic transition: a theory of the epidemiology of population change. 1971. *Milbank Q* 2005; 83(4): 731-57.
13. Geiss LS, Wang J, Cheng YJ, *et al*. Prevalence and incidence trends for diagnosed diabetes among adults aged 20 to 79 years, United States, 1980-2012. *JAMA* 2014; 312: 1218-26.
14. Chen Z, Li SN, Wang X, *et al*. The incidence of hypertension, overweight, and obesity and relationship with cardiovascular events among middle-aged Chinese 6 years follow-up results. *Zhonghua Xin Xue Guan Bing Za Zhi*, 2020; 48: 47-53.
15. Liang Y, Liu R, Du S, *et al*. Trends in incidence of hypertension in Chinese adults, 1991-2009: the China Health and Nutrition Survey. *Int J Cardiol* 2014; 175: 96-101.
16. Sun S, Chen J, Johannesson M, *et al*. Regional differences in health status in China: population health-related quality of life results from the National Health Services Survey 2008. *Health Place* 2011; 17: 671-80.
17. Zhou M, Wang H, Zeng X, *et al*. Mortality, morbidity, and risk factors in China and its provinces, 1990-2017: a systematic analysis for the Global Burden of Disease Study 2017. *Lancet* 2019; 394: 1145-58.
18. Pan J, Shallcross D. Geographic distribution of hospital beds throughout China: a county-level econometric analysis. *Int J Equity Health* 2016; 15: 179.
19. Chen Y, Liang X, Zheng S, *et al*. Association of body fat mass and fat distribution with the incidence of hypertension in a population-based chinese cohort: a 22-year follow-up. *J Am Heart Assoc* 2018; 7: e007153.
20. Sun Z, Zheng L, Zhang X, *et al*. Ethnic differences in the incidence of hypertension among rural Chinese adults: results from Liaoning Province. *PLoS One* 2014; 9: e86867.
21. Chen X, Liu Y, Sun X, *et al*. Comparison of body mass index, waist circumference, conicity index, and waist-to-height ratio for predicting incidence of hypertension: the rural Chinese cohort study. *J Hum Hypertens* 2018; 32: 228-35.

- 1  
2  
3  
4  
5 328 22. Popkin BM, Du S, Zhai F, *et al.* Cohort Profile: The China Health and Nutrition Survey--monitoring and understanding  
6 329 socio-economic and health change in China, 1989-2011. *Int J Epidemiol* 2010; 39: 1435-40.
- 7  
8 330 23. Williams B, Mancia G. Ten Commandments of the 2018 ESC/ESH HTN Guidelines on Hypertension in Adults. *Eur*  
9 331 *Heart J* 2018; 39: 3007-8.
- 10  
11 332 24. Qi SF, Zhang B, Wang HJ, *et al.* Joint effects of age and body mass index on the incidence of hypertension subtypes in  
12 333 the China Health and Nutrition Survey: a cohort study over 22years. *Prev Med* 2016; 89: 23-30.
- 13  
14 334 25. Gao M, Kuang W, Qiu P, *et al.* The time trends of cognitive impairment incidence among older Chinese people in the  
15 335 community: based on the CLHLS cohorts from 1998 to 2014. *Age Ageing* 2017; 46: 787-93.
- 16  
17 336 26. Lu J, Lu Y, Wang X, *et al.* Prevalence, awareness, treatment, and control of hypertension in China: data from 1.7 million  
18 337 adults in a population-based screening study (China PEACE Million Persons Project). *Lancet* 2017; 390: 2549-58.
- 19  
20 338 27. Mendonça RD, Lopes AC, Pimenta AM, *et al.* Ultra-processed food consumption and the incidence of hypertension in a  
21 339 mediterranean cohort: The Seguimiento Universidad de Navarra Project. *Am J Hypertens* 2017; 30: 358-66.
- 22  
23 340 28. Li M, McDermott R. Obesity, albuminuria, and gamma-glutamyl transferase predict incidence of hypertension in  
24 341 indigenous Australians in rural and remote communities in northern Australia. *J Hypertens* 2015; 33: 704-9; discussion 709-  
25 342 710.
- 26  
27 343 29. Bernabe-Ortiz A, Sanchez JF, Carrillo-Larco RM, *et al.* Rural-to-urban migration and risk of hypertension: longitudinal  
28 344 results of the PERU MIGRANT study. *J Hum Hypertens* 2017; 31: 22-8.
- 29  
30 345 30. Fan WG, Xie F, Wan YR, *et al.* The impact of changes in population blood pressure on hypertension prevalence and  
31 346 control in China. *J Clin Hypertens (Greenwich)* 2020; 22: 150-6.
- 32  
33 347 31. He FJ, Li J, Macgregor GA. Effect of longer term modest salt reduction on blood pressure: Cochrane systematic review  
34 348 and meta-analysis of randomised trials. *BMJ* 2013; 346: f1325.
- 35  
36 349 32. Gando Y, Sawada SS, Kawakami R, *et al.* Combined association of cardiorespiratory fitness and family history of  
37 350 hypertension on the incidence of hypertension: a long-term cohort study of Japanese males. *Hypertens Res* 2018; 41: 1063-9.
- 38  
39 351 33. Bo Y, Guo C, Lin C, *et al.* Dynamic changes in leong-term exposure to ambient particulate matter and incidence of  
40 352 hypertension in adults. *Hypertension* 2019; 74: 669-77.
- 41  
42 353 34. Trudel X, Brisson C, Gilbert-Ouimet M, *et al.* Long working hours and the prevalence of masked and sustained  
43 354 hypertension. *Hypertension* 2020; 75: 532-8.
- 44  
45 355 35. Li J, Shi L, Li S, *et al.* Urban-rural disparities in hypertension prevalence, detection, and medication use among Chinese  
46 356 Adults from 1993 to 2011. *Int J Equity Health* 2017, 16: 50.
- 47  
48 357 36. Yu X, Zhang W. All-cause mortality rate in China: do residents in economically developed regions have better health?  
49 358 *Int J Equity Health* 2020, 19: 12.
- 50  
51 359 37. Arici M, Turgan C, Altun B, *et al.* Hypertension incidence in Turkey (HinT): a population-based study. *J Hypertens* 2010;  
52 360 28: 240-4.
- 53  
54 361 38. Feng XL, Pang M, Beard J. Health system strengthening and hypertension awareness, treatment and control: data from  
55  
56  
57  
58  
59  
60

- 362 the China Health and Retirement Longitudinal Study. *Bull World Health Organ* 2014; 92: 29-41.
- 363 39 Kim BJ, Seo DC, Kim BS, *et al.* Relationship between cotinine-verified smoking status and incidence of hypertension in  
364 74,743 Korean adults. *Circ J* 2018; 82: 1659-65.
- 365 40 Gao K, Shi X, Wang W. The life-course impact of smoking on hypertension, myocardial infarction and respiratory  
366 diseases. *Sci Rep* 2017, 7: 4330.
- 367 41 Li G, Wang H, Wang K, *et al.* The association between smoking and blood pressure in men: a cross-sectional study. *BMC*  
368 *Public Health* 2017, 17: 797.
- 369 42 Kim Y, Sharp S, Hwang S, *et al.* Exercise and incidence of myocardial infarction, stroke, hypertension, type 2 diabetes  
370 and site-specific cancers: prospective cohort study of 257 854 adults in South Korea. *BMJ Open* 2019; 9: e025590.
- 371 43 Lu Y, Lu M, Dai H, *et al.* Lifestyle and risk of hypertension: follow-up of a young pre-hypertensive cohort. *Int J Med Sci*  
372 2015, 12: 605-12.
- 373 44 Jayawardana NWIA, Jayalath WATA, Madhujith WMT, *et al.* Aging and obesity are associated with undiagnosed  
374 hypertension in a cohort of males in the Central Province of Sri Lanka: a cross-sectional descriptive study. *BMC Cardiovasc*  
375 *Disord* 2017; 17: 165.
- 376 45 Sinnott SJ, Smeeth L, Williamson E, *et al.* Trends for prevalence and incidence of resistant hypertension: population  
377 based cohort study in the UK 1995-2015. *BMJ* 2017; 358: j3984.
- 378 46 Zhou W, Shi Y, Li YQ, *et al.* Body mass index, abdominal fatness, and hypertension incidence: a dose-response meta-  
379 analysis of prospective studies. *J Hum Hypertens* 2018; 32: 321-33.
- 380 47 Roerecke M, Kaczorowski J, Tobe SW, *et al.* The effect of a reduction in alcohol consumption on blood pressure: a  
381 systematic review and meta-analysis. *Lancet Public Health* 2017; 2: e108-20.
- 382 48 Whelton PK, Carey RM, Aronow WS, *et al.* 2017  
383 ACC/AHA/AAPA/ABC/ACPM/AGS/APhA/ASH/ASPC/NMA/PCNA Guideline for the Prevention, Detection, Evaluation,  
384 and Management of High Blood Pressure in Adults: Executive Summary: A Report of the American College of  
385 Cardiology/American Heart Association Task Force on Clinical Practice Guidelines. *Circulation* 2018; 138: e426-83.
- 386 49 Holmes MV, Dale CE, Zuccolo L, *et al.* Association between alcohol and cardiovascular disease: Mendelian  
387 randomisation analysis based on individual participant data. *BMJ* 2014; 349: g4164.

388

389 Figure 1 Flowchart showing the selection of the subjects who were included in the final analysis of  
390 hypertension incidence in China, with covariate information missing rate of 9.78%

391

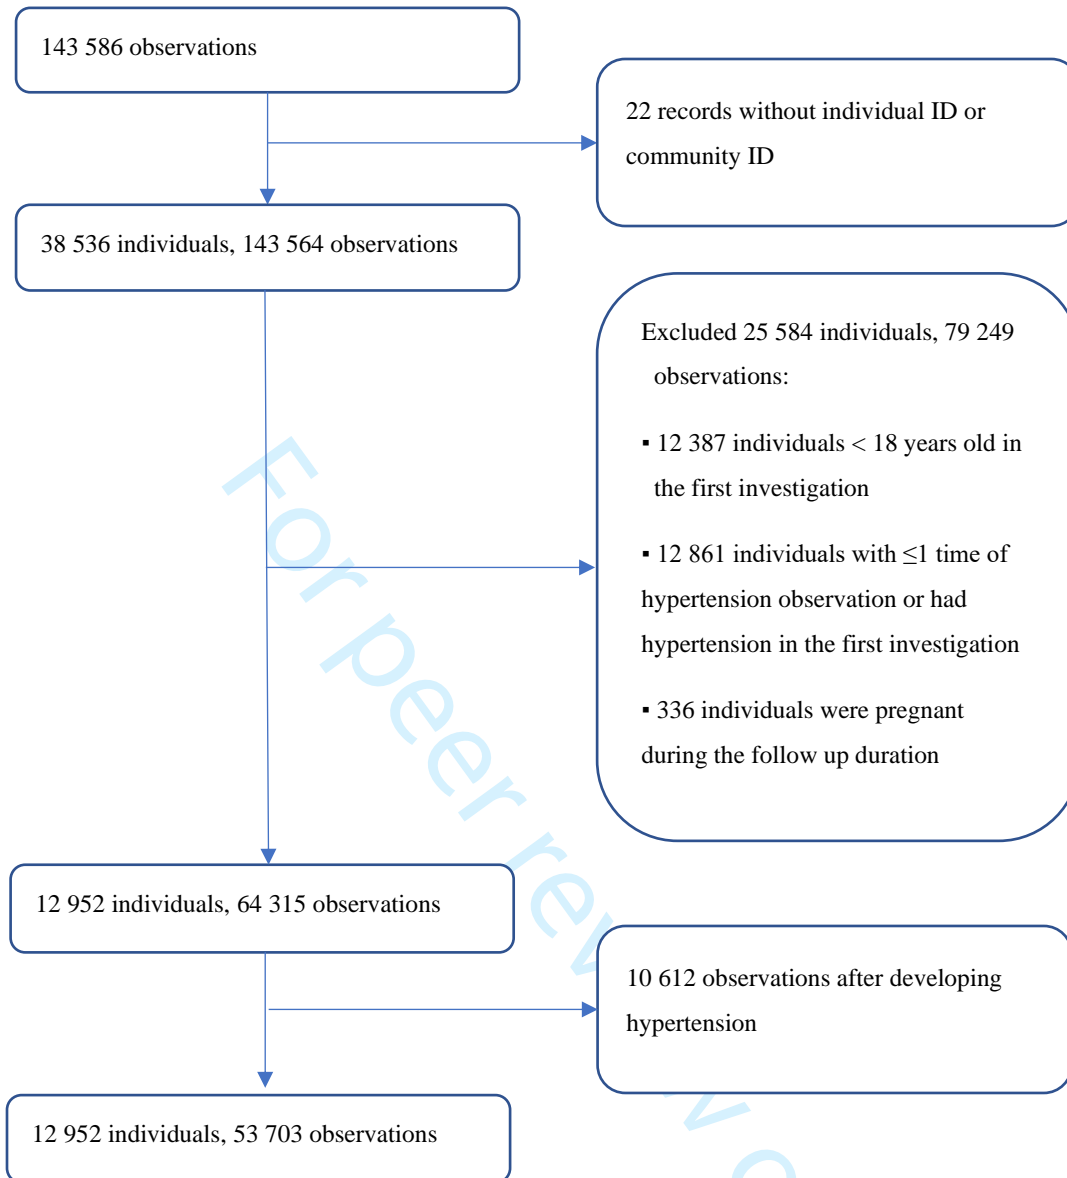





| <b>Results</b>           |     |                                                                                                                                                                                                                                                                                                 |                                         |
|--------------------------|-----|-------------------------------------------------------------------------------------------------------------------------------------------------------------------------------------------------------------------------------------------------------------------------------------------------|-----------------------------------------|
| Participants             | 13* | (a) Report numbers of individuals at each stage of study—eg numbers potentially eligible, examined for eligibility, confirmed eligible, included in the study, completing follow-up, and analysed<br>(b) Give reasons for non-participation at each stage<br>(c) Consider use of a flow diagram | page 8, figure 1, and table 1 in page 9 |
| Descriptive data         | 14* | (a) Give characteristics of study participants (eg demographic, clinical, social) and information on exposures and potential confounders                                                                                                                                                        | page 9-11                               |
|                          |     | (b) Indicate number of participants with missing data for each variable of interest                                                                                                                                                                                                             | page 11-12                              |
|                          |     | (c) <i>Cohort study</i> —Summarise follow-up time (eg, average and total amount)                                                                                                                                                                                                                | page 13                                 |
| Outcome data             | 15* | <i>Cohort study</i> —Report numbers of outcome events or summary measures over time                                                                                                                                                                                                             | Cohort study: page 13                   |
|                          |     | <i>Case-control study</i> —Report numbers in each exposure category, or summary measures of exposure                                                                                                                                                                                            |                                         |
|                          |     | <i>Cross-sectional study</i> —Report numbers of outcome events or summary measures                                                                                                                                                                                                              |                                         |
| Main results             | 16  | (a) Give unadjusted estimates and, if applicable, confounder-adjusted estimates and their precision (eg, 95% confidence interval). Make clear which confounders were adjusted for and why they were included                                                                                    | page 13-16                              |
|                          |     | (b) Report category boundaries when continuous variables were categorized                                                                                                                                                                                                                       | page 15                                 |
|                          |     | (c) If relevant, consider translating estimates of relative risk into absolute risk for a meaningful time period                                                                                                                                                                                | not applicable                          |
| Other analyses           | 17  | Report other analyses done—eg analyses of subgroups and interactions, and sensitivity analyses                                                                                                                                                                                                  | not applicable                          |
| <b>Discussion</b>        |     |                                                                                                                                                                                                                                                                                                 |                                         |
| Key results              | 18  | Summarise key results with reference to study objectives                                                                                                                                                                                                                                        | page 17-19                              |
| Limitations              | 19  | Discuss limitations of the study, taking into account sources of potential bias or imprecision.                                                                                                                                                                                                 |                                         |
|                          |     | Discuss both direction and magnitude of any potential bias                                                                                                                                                                                                                                      | page 19-20                              |
| Interpretation           | 20  | Give a cautious overall interpretation of results considering objectives, limitations, multiplicity of analyses, results from similar studies, and other relevant evidence                                                                                                                      | page 19                                 |
| Generalisability         | 21  | Discuss the generalisability (external validity) of the study results                                                                                                                                                                                                                           | page 17-19                              |
| <b>Other information</b> |     |                                                                                                                                                                                                                                                                                                 |                                         |
| Funding                  | 22  | Give the source of funding and the role of the funders for the present study and, if applicable, for the original study on which the present article is based                                                                                                                                   | page 20                                 |

\*Give information separately for cases and controls in case-control studies and, if applicable, for exposed and unexposed groups in cohort and cross-sectional studies.

**Note:** An Explanation and Elaboration article discusses each checklist item and gives methodological background and published examples of transparent reporting. The STROBE checklist is best used in conjunction with this article (freely available on the Web sites of PLoS Medicine at <http://www.plosmedicine.org/>, Annals of Internal Medicine at <http://www.annals.org/>, and Epidemiology at <http://www.epidem.com/>). Information on the STROBE Initiative is available at [www.strobe-statement.org](http://www.strobe-statement.org).



# BMJ Open

## Long-term trends and regional variations of hypertension incidence in China: a prospective cohort study from the China Health and Nutrition Survey, 1991-2015

|                                 |                                                                                                                                                                                                                                                                                                                                                 |
|---------------------------------|-------------------------------------------------------------------------------------------------------------------------------------------------------------------------------------------------------------------------------------------------------------------------------------------------------------------------------------------------|
| Journal:                        | <i>BMJ Open</i>                                                                                                                                                                                                                                                                                                                                 |
| Manuscript ID                   | bmjopen-2020-042053.R2                                                                                                                                                                                                                                                                                                                          |
| Article Type:                   | Original research                                                                                                                                                                                                                                                                                                                               |
| Date Submitted by the Author:   | 23-Nov-2020                                                                                                                                                                                                                                                                                                                                     |
| Complete List of Authors:       | Luo, Yunmei; Sichuan University West China Hospital<br>Xia, Fan; Sichuan University West China Hospital<br>Yu, Xuexin; Sichuan University West China Hospital<br>Li, Peiyi; Sichuan University West China Hospital<br>Huang, Wenzhi; Sichuan University West China Hospital, Department of Infection Control<br>Zhang, Wei; Sichuan University, |
| <b>Primary Subject Heading</b>: | Public health                                                                                                                                                                                                                                                                                                                                   |
| Secondary Subject Heading:      | Cardiovascular medicine, Epidemiology                                                                                                                                                                                                                                                                                                           |
| Keywords:                       | Hypertension < CARDIOLOGY, EPIDEMIOLOGY, PUBLIC HEALTH                                                                                                                                                                                                                                                                                          |
|                                 |                                                                                                                                                                                                                                                                                                                                                 |

SCHOLARONE™  
Manuscripts

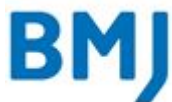

I, the Submitting Author has the right to grant and does grant on behalf of all authors of the Work (as defined in the below author licence), an exclusive licence and/or a non-exclusive licence for contributions from authors who are: i) UK Crown employees; ii) where BMJ has agreed a CC-BY licence shall apply, and/or iii) in accordance with the terms applicable for US Federal Government officers or employees acting as part of their official duties; on a worldwide, perpetual, irrevocable, royalty-free basis to BMJ Publishing Group Ltd ("BMJ") its licensees and where the relevant Journal is co-owned by BMJ to the co-owners of the Journal, to publish the Work in this journal and any other BMJ products and to exploit all rights, as set out in our [licence](#).

The Submitting Author accepts and understands that any supply made under these terms is made by BMJ to the Submitting Author unless you are acting as an employee on behalf of your employer or a postgraduate student of an affiliated institution which is paying any applicable article publishing charge ("APC") for Open Access articles. Where the Submitting Author wishes to make the Work available on an Open Access basis (and intends to pay the relevant APC), the terms of reuse of such Open Access shall be governed by a Creative Commons licence – details of these licences and which [Creative Commons](#) licence will apply to this Work are set out in our licence referred to above.

Other than as permitted in any relevant BMJ Author's Self Archiving Policies, I confirm this Work has not been accepted for publication elsewhere, is not being considered for publication elsewhere and does not duplicate material already published. I confirm all authors consent to publication of this Work and authorise the granting of this licence.

---

## Title Page

**Title : Long-term trends and regional variations of hypertension incidence in China: a prospective cohort study from the China Health and Nutrition Survey, 1991-2015**

Yun-Mei Luo,<sup>1,2</sup> Fan Xia,<sup>3</sup> Xue-Xin Yu,<sup>4</sup> Pei-Yi Li,<sup>1</sup> Wen-Zhi Huang,<sup>5</sup> Wei Zhang<sup>4</sup>

---

<sup>1</sup>Institute of Hospital Management, West China Hospital, Sichuan University, Chengdu, China

<sup>2</sup>West China Medical Publishers, West China Hospital, Sichuan University, Chengdu, China

<sup>3</sup>Department of Neurosurgery, West China Hospital, Sichuan University, Chengdu, China

<sup>4</sup>West China Biomedical Big Data Center, West China Hospital, Sichuan University, Chengdu, China

<sup>5</sup>Department of Infection Control, West China Hospital, Sichuan University, Chengdu, China

---

### Correspondence to

Wei Zhang; weizhanghx@163.com

---

### ABSTRACT

**Objective** The aim is to explore the trends of hypertension incidence and regional variations in China from 1991 to 2015.

**Design** A dynamic prospective cohort study.

**Setting** China Health and Nutrition Survey (CHNS) 1991-2015.

---

21 **Participants** 12 952 Chinese adults aged 18+.

22 **Primary outcome measures** Incident hypertension from 1993 to 2015.

23 **Results** Age-standardized hypertension incidence increased from 40.8 per 1 000 person-years (95% CI,  
24 38.3 to 43.4) between 1993 and 1997 to 48.6 (95% CI, 46.1 to 51.0) between 2011 and 2015. The increasing  
25 trends were further supported by results from subsequent extended Cox proportional hazard model. In  
26 addition, results from the modelling analysis showed that individuals in Eastern, Central, and Northeastern  
27 China had greater risks of hypertension occurrence in comparison with their counterparts in Western China.

28 **Conclusion** Hypertension incidence increased during the study period. The growth called for more  
29 attention on the health education and health promotion of individuals with great risks.

---

### 31 **Strengths and limitations of this study**

32 ► The dynamic cohort study-design employed individuals from diverse social and geographic contexts,  
33 which enabled us to depict the long-term trends of hypertension incidence and regional disparities in  
34 the context of China's rapid social development and population aging.

35 ► We adopted both self-reported health outcomes and objective outcomes from physical tests, which  
36 to some extent minimized the recall bias and underestimation in underserved areas.

37 ► We did not employ a national-representative sample and did not include individuals from all  
38 provinces in China, which undermined the representation of our findings.

39 ► Guidelines recommend to identify hypertension cases by using blood pressure values that are  
40 measured in different days, while individuals' blood pressure data in the CHNS were collected on the  
41 same day, which may lead to unavoidable bias.

---

42       ▶ We did not distinguish the grade of hypertension, and future research is necessary.

43

For peer review only

---

## 44 INTRODUCTION

45 Along with aging population, non-communicable chronic diseases, particularly stroke and ischemic heart  
46 disease, have led to great burden of disease, deaths, and years of life lost (YLLs) in both developed and  
47 developing countries.<sup>1 2</sup> Connected closely with various cardiovascular diseases,<sup>3 4</sup> high systolic blood  
48 pressure was ranked as the leading risk factor of risk-attributable disability-adjusted life-years (DALYs)  
49 among selected 195 countries and territories.<sup>5</sup> For instance, high systolic blood pressure accounted for 2.54  
50 million deaths and more than 5% of DALYs in China in 2017.<sup>6</sup>

51 Existing evidence has confirmed a worldwide high prevalence of hypertension.<sup>4-6</sup> Countries, such as  
52 Singapore<sup>6</sup> and Korea<sup>7</sup>, had a significant proportion of individuals with hypertension. Likewise, with the  
53 extended life expectancy,<sup>8</sup> changes in lifestyle behaviors,<sup>9</sup> and rapid urbanization,<sup>10</sup> developing countries,  
54 such as China, experienced a substantial increase in the prevalence of hypertension, ranging from 13.6% in  
55 1991 to 27.9% in 2015.<sup>11</sup>

56 Although the increasing prevalence of hypertension provided critical information for public health practice  
57 and disease control programs, it could not accurately depict the epidemiologic transition as the incidence  
58 measure.<sup>12</sup> Prior studies have indicated that the increasing prevalence could coexist with the decreasing  
59 incidence in the context of healthy aging.<sup>13</sup> For evidence-based health-promoting initiatives, empirical  
60 research on hypertension incidence is warranted.

61 However, research on the long-term trends of the incidence of hypertension from China is scare and  
62 relatively outdated.<sup>14 15</sup> This is an important knowledge gap because developing countries are experiencing  
63 unprecedented social development. Up-to-date information among developing countries could greatly

1  
2  
3  
4  
5 64 contribute to depict global epidemiologic transitions. Moreover, regional disparities are a major health  
6  
7  
8 65 concern in China as a result of inequitable socio-economic development and health care resource  
9  
10 66 distribution,<sup>16-18</sup> while the existing research provides insufficient information regarding the regional  
11  
12  
13 67 disparities in the hypertension incidence.<sup>19-21</sup>

14  
15  
16 68 Hence, this study aims to explore the long-term trends of hypertension incidence among Chinese from  
17  
18  
19 69 diverse social and geographic contexts. In addition, we are particularly interested in regional variations while  
20  
21  
22 70 taking the individual-level risk factors into account.

## 23 24 25 71 **METHODS**

### 26 27 28 72 **Data source**

29  
30  
31 73 The present study derived data from the China Health and Nutrition Survey (CHNS). CHNS has been  
32  
33  
34 74 collaboratively conducted by Carolina Population Center at the University of North Carolina at Chapel Hill  
35  
36  
37 75 and the National Institute for Nutrition and Health (NINH, former National Institute of Nutrition and Food  
38  
39  
40 76 Safety) at the Chinese Center for Disease Control and Prevention. Initiated in 1989, CHNS consisted of ten-  
41  
42  
43 77 wave data in 1989, 1991, 1993, 1997, 2000, 2004, 2006, 2009, 2011, and 2015, respectively. Overall, CHNS  
44  
45  
46 78 employed a multistage random cluster method to draw the study sample, which included over 30 000  
47  
48  
49 79 individuals from three provincial-level cities and twelve provinces. Individuals in the survey came from  
50  
51  
52 80 diverse social, geographic, and cultural contexts. CHNS employed face-to-face questionnaire interviews to  
53  
54  
55 81 collect data, and the physical health examinations were conducted by well-trained investigators. Information  
56  
57  
58 82 regarding survey design, data collection, and quality control could be retrieved from the cohort profile.<sup>22</sup>

### 59 60 83 **Study design and exclusion criteria**

1  
2  
3  
4  
5 84 The present study employed a dynamic cohort study-design as not all individuals entered the cohort at the  
6  
7  
8 85 same time. To evaluate the long-term trends of hypertension incidence, we excluded individuals (a) without  
9  
10  
11 86 individual ID and community ID; (b) aged under 18 because of the low incidence of hypertension among  
12  
13  
14 87 children and teenagers; (c) with hypertension in his/her first investigation; (d) with only one observation or  
15  
16 88 only one record of hypertension status; and (e) were pregnant during the study period to exclude gestational  
17  
18  
19 89 hypertension. Furthermore, we excluded observations after the diagnosis of hypertension (figure 1). As death  
20  
21 90 data were not available in CHNS, censoring could be for death or lost to follow up.  
22  
23

## 24 91 **Exposures**

25  
26  
27 92 The primary exposure variable of this study were the timing of entering the cohort and geographic regions.  
28  
29  
30 93 For modeling analyses, it was not feasible to treat the waves as continuous variables, and therefore we  
31  
32  
33 94 respectively grouped the individuals entering the cohort from (a) 1991, 1993, and 1997; (b) 2000, 2004,  
34  
35  
36 95 2006, and 2009; and (c) 2011 and 2015. In this case, two dummies were introduced in the model with  
37  
38 96 individuals from 1991 to 1997 as the reference group.  
39  
40  
41 97 Geographic regions were defined according to the bulletin of the National Bureau of Statistics of China.  
42  
43  
44 98 Specifically, we grouped individuals from (a) Beijing, Shanghai, Jiangsu Province, Zhejiang Province, and  
45  
46  
47 99 Shandong Province as Eastern China; (b) Henan Province, Hubei Province, and Hunan Province as Central  
48  
49 100 China; (c) Liaoning Province and Heilongjiang Province as Northeastern China; and (d) Yunnan Province,  
50  
51  
52 101 Guangxi Zhuang Autonomous Region, Guizhou Province, Chongqing, and Shanxi Province as Western  
53  
54 102 China.  
55  
56

## 57 103 **Outcomes**



1  
2  
3  
4  
5 104 We included incidence of hypertension as the primary outcome. First, we adopted self-reported hypertension,  
6  
7  
8 105 which was derived from the answer to the question, “Has a doctor ever told you that you had high blood  
9  
10 106 pressure?”. If individuals self-reported no hypertension history, the outcomes would be further supplemented  
11  
12  
13 107 by the blood pressure tests to avoid the recall bias and underestimation from self-reported measures.  
14  
15 108 According to the criteria of the 2018 Clinical Guideline in China and the 2018 ESC/ESH HTN Guideline,<sup>23</sup>  
16  
17 109 hypertension was confirmed with the systolic blood pressure (SBP)≥140 mmHg or with the diastolic blood  
18  
19 110 pressure (DBP)≥90 mmHg. To guarantee the accuracy of the tests, the blood pressure was detected in  
20  
21  
22 111 triplicate by professional health workers on the same day.  
23  
24

## 25 26 27 112 **Covariates**

28  
29  
30 113 To adjust for variations in baseline characteristics, we introduced several confounding factors that may  
31  
32 114 influence the occurrence of hypertension. These factors included urban vs. rural settings, sociodemographic  
33  
34 115 characteristics (age, sex, race, marital status, educational attainment, and employment status), and lifestyle  
35  
36 116 attributes (BMI, smoking behaviors, alcohol consumption, and physical activity).<sup>15 24</sup>  
37  
38  
39  
40

## 41 117 **Statistical analysis**

42  
43  
44 118 First, we performed chi-square tests and Kruskal-Wallis rank-sum tests to evaluate variations in baseline  
45  
46 119 characteristics over time. Second, we calculated the crude incidence of hypertension as below:<sup>25</sup>  
47  
48  
49

50 120 
$$\text{Incidence} = \frac{\text{number of new hypertension cases}}{\text{total person - years at risk}}$$

51  
52  
53 121 The ‘person-years at risk’ is the period from the first hypertension-free year to the year when the subsequent  
54  
55 122 hypertension is confirmed. In addition, we conducted direct standardization to calculate the age-standardized  
56  
57  
58  
59  
60

1  
2  
3  
4  
5 123 incidence of hypertension by using the study sample from wave 2011 and wave 2015 as the standard  
6  
7  
8 124 population. Subgroup analyses were conducted by sex.  
9

10  
11 125 To further evaluate the long-term trends and geographic variations of incident hypertension, we performed  
12  
13  
14 126 an extended Cox proportional hazard model while including all covariates to control for baseline variations.  
15  
16 127 Because the effect of age didn't conform to the proportional hazard assumption, we performed a time-  
17  
18  
19 128 dependent Cox regression model with age as a time-dependent variable. As for sensitivity analyses, we  
20  
21  
22 129 construct the multi-level Poisson regression indicating similar findings.  
23

24  
25 130 Data analyses were performed with Stata 15.0 (StataCorp, TX, USA). A two-tailed *P* value of less than 0.05  
26  
27  
28 131 was considered statistical significance.  
29

### 30 31 132 **Patient and public involvement statement** 32

33  
34 133 Patients and the public were not involved in the research.  
35

## 36 37 134 **RESULTS** 38

### 39 40 41 135 **Study population** 42

43  
44 136 The CHNS consisted of data of 38 558 individuals with 143 586 observations from 1989 and 2015, and the  
45  
46  
47 137 present study only included 12 952 individuals from 1991 to 2015 after sample selection (figure 1). Table 1  
48  
49  
50 138 presents the distribution of observations from included individuals during the study period. For example, 5  
51  
52  
53 139 938 individuals entered the cohort in 1991, with only 912 followed-up in 2015 (table 1). Among the 12 952  
54  
55  
56 140 participants, 5 119 of them developed hypertension during the follow-up period.  
57

58  
59  
60 141

1  
2  
3  
4  
5 142 **Table 1** Observation distribution of study sample from 1991 to 2015

| Wave | 1991 | 1993 | 1997 | 2000 | 2004 | 2006 | 2009 | 2011 | 2015 |
|------|------|------|------|------|------|------|------|------|------|
| 1989 |      |      |      |      |      |      |      |      |      |
| 1991 | 5938 |      |      |      |      |      |      |      |      |
| 1993 | 5166 | 677  |      |      |      |      |      |      |      |
| 1997 | 3313 | 485  | 1691 |      |      |      |      |      |      |
| 2000 | 2658 | 335  | 1451 | 1009 |      |      |      |      |      |
| 2004 | 2050 | 234  | 1037 | 813  | 837  |      |      |      |      |
| 2006 | 1722 | 188  | 865  | 642  | 684  | 376  |      |      |      |
| 2009 | 1378 | 142  | 385  | 398  | 413  | 302  | 692  |      |      |
| 2011 | 1200 | 114  | 329  | 335  | 359  | 216  | 630  | 1732 |      |
| 2015 | 912  | 86   | 250  | 236  | 231  | 152  | 353  | 1732 | 0    |

143

144 Table 2 presents the baseline characteristics of the study sample. Overall, variations existed in all baseline  
 145 characteristics. Newly recruited individuals were older ( $P < 0.001$ ) and well-educated ( $P < 0.001$ ). They  
 146 were more likely to be obese ( $P < 0.001$ ), Han ( $P < 0.001$ ), and male ( $P < 0.001$ ), and they were less likely  
 147 to be smokers ( $P < 0.001$ ), employed ( $P < 0.001$ ), and physically active ( $P < 0.001$ ).

148

149 **Table 2** Baseline characteristics of study individuals, *n*(%)\*

| Characteristic           | Time entering the cohort |              |              | P value |
|--------------------------|--------------------------|--------------|--------------|---------|
|                          | 1991-1997                | 2000-2009    | 2011-2015    |         |
| Region                   |                          |              |              |         |
| Western                  | 2256 (27.16)             | 611 (20.97)  | 523 (30.20)  | <0.001  |
| Central                  | 2817 (33.92)             | 800 (27.45)  | 85 (4.91)    |         |
| Northeastern             | 1288 (15.51)             | 794 (27.25)  | 83 (4.79)    |         |
| Eastern                  | 1945 (23.42)             | 709 (24.33)  | 1041 (60.10) |         |
| Urban-rural              |                          |              |              |         |
| Rural                    | 5616 (67.61)             | 1717 (58.92) | 777 (44.86)  | <0.001  |
| Urban                    | 2690 (32.39)             | 1197 (41.08) | 955 (55.14)  |         |
| Age (years)              |                          |              |              |         |
| 18-29                    | 2374 (28.58)             | 695 (23.85)  | 221 (12.76)  | <0.001  |
| 30-39                    | 2382 (28.68)             | 854 (29.31)  | 345 (19.92)  |         |
| 40-49                    | 1752 (21.09)             | 621 (21.31)  | 424 (24.48)  |         |
| 50-59                    | 1004 (12.09)             | 405 (13.90)  | 456 (26.33)  |         |
| ≥60                      | 794 (9.56)               | 339 (11.63)  | 286 (16.51)  |         |
| Sex                      |                          |              |              |         |
| Male                     | 3986 (47.99)             | 1168 (40.08) | 736 (42.49)  | <0.001  |
| Female                   | 4320 (52.01)             | 1746 (59.92) | 996 (57.51)  |         |
| BMI (kg/m <sup>2</sup> ) |                          |              |              |         |
| <18.5                    | 763 (9.27)               | 191 (6.60)   | 60 (3.46)    | <0.001  |
| 18.5-23.9                | 6012 (73.07)             | 1776 (61.35) | 955 (55.14)  |         |
| 24.0-27.9                | 1238 (15.05)             | 760 (26.25)  | 545 (31.47)  |         |
| ≥28                      | 215 (2.61)               | 168 (5.80)   | 172 (9.93)   |         |
| Race                     |                          |              |              |         |
| Other                    | 1038 (12.59)             | 340 (11.69)  | 72 (4.17)    | <0.001  |
| Han                      | 7204 (87.41)             | 2568 (88.31) | 1656 (95.83) |         |
| Marital status           |                          |              |              |         |

|                                   |              |              |              |        |
|-----------------------------------|--------------|--------------|--------------|--------|
| Other                             | 1183 (14.29) | 341 (11.82)  | 192 (11.14)  | <0.001 |
| Married                           | 7098 (85.71) | 2545 (88.18) | 1531 (88.86) |        |
| Education attainment              |              |              |              |        |
| Primary school and below          | 4416 (53.81) | 741 (26.43)  | 410 (23.73)  | <0.001 |
| Middle school                     | 2377 (28.97) | 1103 (39.34) | 457 (26.45)  |        |
| High school or equivalent         | 1240 (15.11) | 742 (26.46)  | 472 (27.31)  |        |
| College and above                 | 173 (2.11)   | 218 (7.77)   | 389 (22.51)  |        |
| Employed                          |              |              |              |        |
| No                                | 1145 (13.85) | 1044 (35.95) | 716 (41.34)  | <0.001 |
| Yes                               | 7121 (86.15) | 1860 (64.05) | 1016 (58.66) |        |
| Smoking history                   |              |              |              |        |
| Never or smoking cessation        | 5300 (64.72) | 2163 (74.97) | 1326 (77.18) | <0.001 |
| Current smoker, cigarettes < 20/d | 1481 (18.09) | 370 (12.82)  | 205 (11.93)  |        |
| Current smoker, cigarettes ≥ 20/d | 1408 (17.19) | 352 (12.20)  | 187 (10.88)  |        |
| Alcohol consumption               |              |              |              |        |
| Never                             | 5042 (61.82) | 2037 (70.93) | 1116 (65.03) | <0.001 |
| Not more than once per month      | 469 (5.75)   | 102 (3.55)   | 144 (8.39)   |        |
| 1-3 times per month               | 661 (8.10)   | 173 (6.02)   | 127 (7.40)   |        |
| 1-2 times per week                | 781 (9.58)   | 227 (7.90)   | 127 (7.40)   |        |
| 3-4 times per week                | 450 (5.52)   | 126 (4.39)   | 64 (3.73)    |        |
| On a daily basis                  | 753 (9.23)   | 207 (7.21)   | 138 (8.04)   |        |
| Physical activity                 |              |              |              |        |
| Very light                        | 997 (12.56)  | 780 (27.73)  | 823 (49.46)  | <0.001 |
| Light                             | 1307 (16.46) | 799 (28.40)  | 453 (27.22)  |        |
| Moderate                          | 1291 (16.26) | 461 (16.39)  | 209 (12.56)  |        |
| Heavy or very heavy               | 4344 (54.71) | 773 (27.48)  | 179 (10.76)  |        |

150 \*Overall, we included 11 685 individuals in the modelling analyses after excluding 97 individuals without

151 BMI, 74 without race, 62 without marital status, 214 without educational attainment, 50 without employment

1  
2  
3  
4  
5 152 status, 160 without smoking history, 208 without alcohol consumption, and 449 without physical activity.

6  
7  
8 153 (Missing rate 9.78 %)

9  
10  
11 154

12  
13  
14  
15 155 **Crude and age-standardized incidence**

16  
17  
18 156 Table 3 presents the crude and age-standardized hypertension incidence during the study period. For the

19  
20 157 calculation of hypertension incidence, we employed the full sample of 12 952 individuals with 53 703

21  
22  
23 158 observations. The age-standardized incidence of hypertension witnessed a significant increase, ranging from

24  
25 159 40.8 per 1 000 person-years (95% CI: 38.3 to 43.4) between 1993 and 1997 to 48.6 per 1 000 person-years

26  
27  
28 160 (95% CI: 46.1 to 51.0) between 2011 and 2015. The increasing pattern was also exhibited among men (1993-

29  
30 161 1997: 46.2, 95% CI: 42.1 to 50.4; 2011-2015: 55.7, 95% CI: 51.7 to 59.7) and women (1993-1997: 36.5,

31  
32  
33 162 95% CI: 33.2 to 39.7; 2011-2015: 43.3, 95% CI: 40.2 to 46.3).

34  
35  
36 163

164 **Table 3** Crude and age-standardized incidence over time, per 1000 person-years

| <b>Incidence</b>                      | <b>1991</b> | <b>1993-1997</b> | <b>2000-2009</b> | <b>2011-2015</b> |
|---------------------------------------|-------------|------------------|------------------|------------------|
| Total                                 |             |                  |                  |                  |
| Case (person-year)                    | -           | 1114 (35486)     | 2571 (70575)     | 1434 (29492)     |
| Crude incidence (95% CI)              | -           | 31.3 (29.6-33.2) | 36.4 (35.0-37.8) | 48.6 (46.1-51.2) |
| Age-standardized incidence (95% CI) * | -           | 40.8 (38.3-43.4) | 41.5 (39.9-43.2) | 48.6 (46.1-51.0) |
| Male                                  |             |                  |                  |                  |
| Case (person-year)                    | -           | 594 (17530)      | 1292 (32524)     | 699 (12532)      |
| Crude incidence (95% CI)              | -           | 33.8 (31.2-36.7) | 39.7 (37.6-41.9) | 55.7 (51.7-60.0) |
| Age-standardized incidence (95% CI) * | -           | 46.2 (42.1-50.4) | 45.7 (43.0-48.3) | 55.7 (51.7-59.7) |
| Female                                |             |                  |                  |                  |
| Case (person-year)                    | -           | 520 (17956)      | 1279 (38051)     | 735 (16960)      |
| Crude incidence (95% CI)              | -           | 28.9 (26.5-31.5) | 33.6 (31.8-35.5) | 43.3 (40.3-46.5) |
| Age-standardized incidence (95% CI) * | -           | 36.5 (33.2-39.7) | 38.0 (35.9-40.1) | 43.3 (40.2-46.3) |

165 \* Age-standardized incidence was calculated using the study sample in 2011-2015 as the standard population.

166

### 167 **Extended Cox proportional hazard analysis**

168 For the modeling analysis, we included 11 685 individuals without missing data (missing rate, 9.78%).

169 Among the identified cases, the duration from free of hypertension to incident hypertension ranged from 2  
170 to 24 years, with a median of 9 years.

171 Table 4 presents results from extended Cox proportional hazard analysis while taking variations in baseline  
172 characteristics into account. First, the increasing trends of hypertension incidence were robust, as suggested  
173 by the modeling results. Specifically, individuals entering the cohort from 2000 to 2009 (aHR = 1.10, 95%  
174 CI: 1.01 to 1.21) and those from 2011 to 2015 (aHR = 1.19, 95% CI: 1.04 to 1.37) had a higher risk of

1  
2  
3  
4  
5 175 hypertension in comparison with individuals entering the cohort from 1991 to 1997. With reference to  
6  
7  
8 176 regional variations, individuals in Central (aHR = 1.26, 95% CI: 1.16 to 1.37), Northeastern (aHR = 1.56,  
9  
10 177 95% CI: 1.41 to 1.72), and Eastern China (aHR = 1.48, 95% CI: 1.36 to 1.63) respectively had a higher risk  
11  
12  
13 178 of hypertension occurrence relative to their counterparts in Western China.  
14  
15  
16 179

For peer review only



180 **Table 4** Extended Cox proportional hazard analysis of hypertension incidence

| Characteristic                | aHR (95% CI)      | P value |
|-------------------------------|-------------------|---------|
| Timing of entering the cohort |                   |         |
| 1991-1997                     | Ref.              |         |
| 2000-2009                     | 1.10 (1.01-1.21)  | 0.025   |
| 2011-2015                     | 1.19 (1.04-1.37)  | 0.010   |
| Geographic region             |                   |         |
| Western                       | Ref.              |         |
| Central                       | 1.26 (1.16-1.37)  | <0.001  |
| Northeastern                  | 1.56 (1.41-1.72)  | <0.001  |
| Eastern                       | 1.48 (1.36-1.63)  | <0.001  |
| Urban (vs. rural)             | 0.94 (0.88-1.01)  | 0.109   |
| Age*                          |                   |         |
| 18-29                         | Ref.              |         |
| 30-39                         | 1.93 (1.41-2.65)  | <0.001  |
| 40-49                         | 3.99 (2.93-5.43)  | <0.001  |
| 50-59                         | 5.16 (3.74-7.12)  | <0.001  |
| ≥60                           | 9.11 (6.50-12.77) | <0.001  |
| Female (vs. male)             | 0.81 (0.74-0.88)  | <0.001  |
| BMI (kg/m <sup>2</sup> )      |                   |         |
| <18.5                         | Ref.              |         |
| 18.5-23.9                     | 1.31 (1.16-1.48)  | <0.001  |
| 24.0-27.9                     | 2.07 (1.81-2.36)  | <0.001  |
| ≥28                           | 2.82 (2.37-3.34)  | <0.001  |
| Race (Han vs. others)         | 1.11 (1.01-1.23)  | 0.032   |
| Married (vs. others)          | 0.92 (0.83-1.02)  | 0.149   |
| Educational attainment        |                   |         |
| Primary school and below      | Ref.              |         |
| Middle school                 | 0.91 (0.84-0.99)  | 0.020   |

|                                        |                  |       |
|----------------------------------------|------------------|-------|
| High school or equivalent              | 0.86 (0.77-0.95) | 0.002 |
| College and above                      | 0.82 (0.68-0.98) | 0.033 |
| Employed (yes vs. no)                  | 0.90 (0.82-0.99) | 0.036 |
| Smoking                                |                  |       |
| Never or smoking cessation             | Ref.             |       |
| Current smoker, cigarettes < 20/d      | 0.98 (0.89-1.07) | 0.752 |
| Current smoker, cigarettes $\geq$ 20/d | 1.05 (0.96-1.16) | 0.237 |
| Alcohol consumption                    |                  |       |
| never                                  | Ref.             |       |
| Not more than once per month           | 0.89 (0.78-1.03) | 0.125 |
| 1–3 times per month                    | 1.17 (1.04-1.32) | 0.006 |
| 1–2 times per week                     | 1.00 (0.89-1.12) | 0.963 |
| 3–4 times per week                     | 1.05 (0.92-1.21) | 0.412 |
| On a daily basis                       | 1.18 (1.06-1.31) | 0.002 |
| Physical activity                      |                  |       |
| very light                             | Ref.             |       |
| light                                  | 0.92 (0.83-1.02) | 0.154 |
| moderate                               | 0.99 (0.88-1.11) | 0.930 |
| heavy and very                         | 0.91 (0.82-1.02) | 0.118 |

181 \*Estimated time effect of age,  $P < 0.001$

182

183 In addition, there existed no urban-rural differences in developing hypertension (Table 4). Risks of incident  
 184 hypertension increased with age, BMI, and alcohol consumption, while it was negatively associated with  
 185 educational attainment. Women had a lower risk of incident hypertension compared with men (aHR = 0.81,  
 186 95% CI: 0.74 to 0.88). Relative to those without a job, employees had a lower risk of developing hypertension  
 187 (aHR = 0.90, 95% CI: 0.82 to 0.99). Han individuals were significantly associated with a higher risk (aHR =

1  
2  
3  
4  
5 188 1.11, 95% CI: 1.01 to 1.23) relative to the minority.  
6  
7

8  
9 189 **DISCUSSION**

10  
11  
12 190 By employing a study sample of 12 925 individuals from diverse social and geographic contexts, we found  
13  
14 191 the age-standardized incidence of hypertension increased during the study period. The increasing pattern  
15  
16 192 remained even after controlling for variations in baseline characteristics. Furthermore, we found that  
17  
18 193 individuals in economically developed Eastern, Central, and Northeastern China had greater risks of incident  
19  
20 194 hypertension in comparison with those in Western China.  
21  
22  
23  
24

25 195 Instead of focusing on the incidence measure, the vast majority of prior studies focused on the prevalence  
26  
27 196 measure. For example, one of the previous studies in China indicated that the prevalence of hypertension  
28  
29 197 rose substantially from 13.6% in 1991 to 27.9% in 2015.<sup>11</sup> The findings were further supplemented by results  
30  
31 198 from Lu *et al.* (2017), which suggested a higher prevalence of hypertension among those aged between 35  
32  
33 199 and 75 years old (44.7%).<sup>26</sup> Compared with these earlier studies, our focus on the incidence measure  
34  
35 200 provided a more accurate reflection of the epidemiologic transition of hypertension in China.<sup>12</sup> Our findings  
36  
37 201 updated the trends of hypertension incidence in comparison with that from Liang *et al.* (2014), which  
38  
39 202 indicated a similar pattern from 1991 to 2009.<sup>15</sup> Even though hypertension incidence appeared to vary across  
40  
41 203 countries,<sup>27-29</sup> the comparison is untenable because we adopted different standard populations. Further  
42  
43 204 empirical research across countries is warranted.  
44  
45  
46  
47  
48  
49  
50

51  
52 205 With the rapid economic development, people often change their dietary patterns from light diet to high salt  
53  
54 206 and fat diet along with a secondary lifestyle.<sup>30</sup> These changes would significantly impact the prevalence and  
55  
56 207 control of hypertension in China.<sup>30</sup> In addition, due to data limitation, we were unable to introduce several  
57  
58  
59  
60

1  
2  
3  
4  
5 208 potential risks factors, such as sodium intake or dietary pattern, parental history, psychological status,  
6  
7  
8 209 ambient air pollutants, working hours, and household income.<sup>31-34</sup> These factors may explain the residual  
9  
10 210 time-effects in the model.

11  
12  
13  
14 211 Although existing evidence on the regional disparities of hypertension incidence is scant, prior research  
15  
16 212 indicates that Central, Northeastern, and Eastern China had a higher prevalence of hypertension compared  
17  
18  
19 213 with Western China,<sup>35</sup> which is in line with our findings. In sharp contrast, prior investigators have noted  
20  
21 214 that Northeastern and Central China had lower all-cause mortality rates relative to Western China.<sup>36</sup> These  
22  
23  
24 215 findings appear to suggest that individuals in China's economically developed regions are experiencing  
25  
26 216 extended life expectancy with relatively unhealthy aging.<sup>12</sup> However, one should be aware of the possibility  
27  
28  
29 217 that although individuals in Western China had lower risks of hypertension compared with the other three  
30  
31  
32 218 regions, local public awareness and timely treatment could be a challenging issue.

33  
34  
35 219 Differed from previous studies,<sup>15 37</sup> no urban-rural disparities were observed in the present study. This may  
36  
37  
38 220 be a result of the narrowing gap of lifestyle between rural and urban residents. With the rapid economic  
39  
40  
41 221 development and urbanization in the past few decades, the lifestyle and dietary pattern of rural residents are  
42  
43 222 approaching to those of their counterparts in urban China.<sup>9 10</sup> This possibility has been further supported by  
44  
45  
46 223 the fact that the prevalence of hypertension in rural China exceeded that of urban China in 2015.<sup>26</sup> Taking  
47  
48 224 into account the lower treatment rate and insufficient awareness among rural residents,<sup>38</sup> one should direct  
49  
50  
51 225 more attention to rural China.

52  
53  
54 226 Moreover, we found that smoking history was not associated with incident hypertension. The effect of  
55  
56  
57 227 smoking on the development of the chronic disease is unclear and appears to differ across life courses.<sup>39-41</sup>  
58  
59  
60

228 Prior research based on Korean has found a J-shaped association between physical activity and incident  
229 hypertension,<sup>42</sup> while the present study on Chinese did not observe a similar association, which is in line  
230 with findings based on Japanese.<sup>43</sup> The effect of physical activity on the development of hypertension seems  
231 to be controversial and varies across countries. Further analyses are warranted.

232 Consistent with the previous studies,<sup>44-47</sup> several risk factors, including age, gender, educational attainment,  
233 race, alcohol consumption, and BMI, were confirmed by our analyses. The growing incidence of  
234 hypertension emphasizes the early prevention, education, detection, and management for hypertension.<sup>48</sup>  
235 Mentoring aforementioned lifestyle behaviors, such as alcohol consumption, may be helpful to constrain the  
236 hypertension incidence.<sup>49</sup> Public health and lifestyle interventions targeting high-risk individuals, such as  
237 older adults, men, and obese population, hold promise.

## 238 **Conclusion**

239 Hypertension incidence increased during the study period. Individuals in Eastern, Central, and Northeastern  
240 China had greater risks of hypertension in comparison with their counterparts in Western China. Risks of  
241 incident hypertension increased with age, BMI, and alcohol consumption, but negatively associated with  
242 educational attainment. The growth of hypertension incidence calls for more attention on the health  
243 education and health promotion of individuals with great risks.

## 244 **Strengths and limitations of this study**

245 The present study has two major strengths. First, the dynamic cohort study-design employed individuals  
246 from diverse social and geographic contexts, which enabled us to depict the long-term trends of hypertension  
247 incidence and regional disparities in the context of China's rapid social development and population aging.

1  
2  
3  
4  
5 248 In addition, we adopted both self-reported health outcomes and objective outcomes from physical tests,  
6  
7  
8 249 which avoided the recall bias and underestimation in underserved areas.  
9

10  
11 250 Nevertheless, this study is subject to several limitations. First, we did not employ a national-representative  
12  
13 251 sample and did not include individuals from all provinces in China, which undermined the representation of  
14  
15  
16 252 our findings. As a community-based survey, the CHNS excluded institutionalized individuals, which further  
17  
18  
19 253 diminished the representation of our findings among Chinese. Third, 2018 Clinical Guideline in China  
20  
21 254 recommend to identify hypertension cases by using blood pressure values that are measured in different  
22  
23  
24 255 days<sup>23</sup>, while individuals' blood pressure data in the CHNS were collected on the same day in the CHNS,  
25  
26  
27 256 leading to unavoidable bias. Last, we did not distinguish the grade of hypertension, and future research is  
28  
29  
30 257 necessary.  
31

32  
33 258  
34  
35

36 259 **Acknowledgments** We thank the National Institute for Nutrition and Health, China Center for Disease Control and  
37  
38 260 Prevention, Carolina Population Center at(P2C HD050924, T32 HD007168), the University of North Carolina at Chapel Hill,  
39  
40  
41 261 the NIH (R01-HD30880, DK056350, R24 HD050924, and R01-HD38700) and the NIH Fogarty International Center (D43  
42  
43  
44 262 TW009077, D43 TW007709) for financial support for the CHNS data collection and analysis files from 1989 to 2015 and  
45  
46 263 future surveys, and the China-Japan Friendship Hospital, Ministry of Health for support for CHNS 2009, Chinese National  
47  
48  
49 264 Human Genome Center at Shanghai since 2009, and Beijing Municipal Center for Disease Prevention and Control since 2011.  
50

51  
52 265 **Contributors** WZ designed this study and revised the manuscript. Y-ML, FX, and X-XY performed data clean, statistical  
53  
54  
55 266 analysis, and wrote the first draft of the manuscript, which P-YL and W-ZH subsequently revised. All authors read the article  
56  
57  
58 267 and approve it for publication.  
59  
60

268 **Funding** This study was supported by China's National Development and Reform Commission Grant (No. 2018GFGW001)  
269 to Wei Zhang.

270 **Competing interests** None declared.

271 **Patient consent for publication** Not required.

272 **Ethics approval** China Health and Nutrition Survey (CHNS) was approved by the ethics committee of Carolina Population  
273 Center at the University of North Carolina at Chapel Hill and the NINH at the CCDC. Informed consent was obtained from  
274 all subjects before the investigation.

275 **Data availability statement** Data are available from China Health and Nutrition Survey  
276 (<https://www.cpc.unc.edu/projects/china/data/>).

277 **ORCID iD**

278 Wei Zhang <http://orcid.org/0000-0003-3113-9577>

## 280 REFERENCES

- 281 1. GBD 2017 Causes of Death Collaborators. Global, regional, and national age-sex-specific mortality for 282 causes of  
282 death in 195 countries and territories, 1980-2017: a systematic analysis for the Global Burden of Disease Study 2017. *Lancet*  
283 2018; 392: 1736-88.
- 284 2. GBD 2017 Risk Factor Collaborators. Global, regional, and national comparative risk assessment of 84 behavioural,  
285 environmental and occupational, and metabolic risks or clusters of risks for 195 countries and territories, 1990-2017: a  
286 systematic analysis for the Global Burden of Disease Study 2017. *Lancet* 2018; 392: 1923-94.
- 287 3. Lloyd-Jones DM, Larson MG, Leip EP, *et al.* Lifetime risk for developing congestive heart failure: the Framingham Heart  
288 Study. *Circulation* 2002; 106: 3068-72.
- 289 4. Lewington S, Clarke R, Qizilbash N, *et al.* Age-specific relevance of usual blood pressure to vascular mortality: a meta-  
290 analysis of individual data for one million adults in 61 prospective studies. *Lancet* 2002; 360: 1903-13.
- 291 5. GBD 2017 DALYs and HALE Collaborators. Global, regional, and national disability-adjusted life-years (DALYs) for  
292 359 diseases and injuries and healthy life expectancy (HALE) for 195 countries and territories, 1990-2017: a systematic  
293 analysis for the Global Burden of Disease Study 2017. *Lancet* 2018; 392: 1859-922.

- 294 6. Liew SJ, Lee JT, Tan CS, *et al*. Sociodemographic factors in relation to hypertension prevalence, awareness, treatment  
295 and control in a multi-ethnic Asian population\_ a cross sectional study. *BMJ Open* 2019; 9: e025869.
- 296 7. Cho SMJ, Lee H, Kim HC. Differences in prevalence of hypertension subtypes according to the 2018 Korean Society.  
297 *Clin Hypertens* 2019; 25: 26.
- 298 8. GBD 2017 Mortality Collaborators. Global, regional, and national age-sex-specific mortality and life expectancy, 1950-  
299 2017: a systematic analysis for the Global Burden of Disease Study 2017. *Lancet* 2018; 392: 1684-735.
- 300 9. Gong P, Liang S, Carlton EJ, *et al*. Urbanisation and health in China. *Lancet* 2012; 379: 843-52.
- 301 10. LeBlanc AG, Chaput JP. Urbanisation and fitness: worrying trends from China. *Lancet Child Adolesc Health* 2019; 3:  
302 837-9.
- 303 11. Wang Z, Chen Z, Zhang L, *et al*. Status of Hypertension in China: Results From the China Hypertension Survey, 2012-  
304 2015. *Circulation* 2018; 137: 2344-56.
- 305 12. Omran AR. The epidemiologic transition: a theory of the epidemiology of population change. 1971. *Milbank Q* 2005;  
306 83(4): 731-57.
- 307 13. Geiss LS, Wang J, Cheng YJ, *et al*. Prevalence and incidence trends for diagnosed diabetes among adults aged 20 to 79  
308 years, United States, 1980-2012. *JAMA* 2014; 312: 1218-26.
- 309 14. Chen Z, Li SN, Wang X, *et al*. The incidence of hypertension, overweight, and obesity and relationship with  
310 cardiovascular events among middle-aged Chinese 6 years follow-up results. *Zhonghua Xin Xue Guan Bing Za Zhi*, 2020; 48:  
311 47-53.
- 312 15. Liang Y, Liu R, Du S, *et al*. Trends in incidence of hypertension in Chinese adults, 1991-2009: the China Health and  
313 Nutrition Survey. *Int J Cardiol* 2014; 175: 96-101.
- 314 16. Yu X, Xia F, Zhang W. Trends and geographic variations in self-reported diabetes incidence: A prospective open cohort  
315 study of Chinese men and women, 1997-2015. *Diabet Med* 2020: e14447.
- 316 17. Zhou M, Wang H, Zeng X, *et al*. Mortality, morbidity, and risk factors in China and its provinces, 1990-2017: a  
317 systematic analysis for the Global Burden of Disease Study 2017. *Lancet* 2019; 394: 1145-58.
- 318 18. Xia F, Yu X, Li Y, *et al*. Geographic variations of stroke incidence in chinese communities: an 18-year prospective  
319 cohort study from 1997 to 2015. *J Stroke* 2020; 22: 345-56.
- 320 19. Chen Y, Liang X, Zheng S, *et al*. Association of body fat mass and fat distribution with the incidence of hypertension in  
321 a population-based chinese cohort: a 22-year follow-up. *J Am Heart Assoc* 2018; 7: e007153.
- 322 20. Sun Z, Zheng L, Zhang X, *et al*. Ethnic differences in the incidence of hypertension among rural Chinese adults: results  
323 from Liaoning Province. *PLoS One* 2014; 9: e86867.
- 324 21. Chen X, Liu Y, Sun X, *et al*. Comparison of body mass index, waist circumference, conicity index, and waist-to-height  
325 ratio for predicting incidence of hypertension: the rural Chinese cohort study. *J Hum Hypertens* 2018; 32: 228-35.
- 326 22. Popkin BM, Du S, Zhai F, *et al*. Cohort Profile: The China Health and Nutrition Survey--monitoring and understanding  
327 socio-economic and health change in China, 1989-2011. *Int J Epidemiol* 2010; 39: 1435-40.



- 1  
2  
3  
4  
5 328 23. Williams B, Mancia G. Ten Commandments of the 2018 ESC/ESH HTN Guidelines on Hypertension in Adults. *Eur Heart J* 2018; 39: 3007-8.  
6 329  
7  
8 330 24 Qi SF, Zhang B, Wang HJ, *et al*. Joint effects of age and body mass index on the incidence of hypertension subtypes in  
9 331 the China Health and Nutrition Survey: a cohort study over 22years. *Prev Med* 2016; 89: 23-30.  
10  
11 332 25 Gao M, Kuang W, Qiu P, *et al*. The time trends of cognitive impairment incidence among older Chinese people in the  
12 333 community: based on the CLHLS cohorts from 1998 to 2014. *Age Ageing* 2017; 46: 787-93.  
13  
14 334 26 Lu J, Lu Y, Wang X, *et al*. Prevalence, awareness, treatment, and control of hypertension in China: data from 1.7 million  
15 335 adults in a population-based screening study (China PEACE Million Persons Project). *Lancet* 2017; 390: 2549-58.  
16  
17 336 27 Mendonça RD, Lopes AC, Pimenta AM, *et al*. Ultra-processed food consumption and the incidence of hypertension in a  
18 337 mediterranean cohort: The Seguimiento Universidad de Navarra Project. *Am J Hypertens* 2017; 30: 358-66.  
19  
20 338 28 Li M, McDermott R. Obesity, albuminuria, and gamma-glutamyl transferase predict incidence of hypertension in  
21 339 indigenous Australians in rural and remote communities in northern Australia. *J Hypertens* 2015; 33: 704-9; discussion 709-  
22 340 710.  
23  
24 341 29 Bernabe-Ortiz A, Sanchez JF, Carrillo-Larco RM, *et al*. Rural-to-urban migration and risk of hypertension: longitudinal  
25 342 results of the PERU MIGRANT study. *J Hum Hypertens* 2017; 31: 22-8.  
26  
27 343 30 Fan WG, Xie F, Wan YR, *et al*. The impact of changes in population blood pressure on hypertension prevalence and  
28 344 control in China. *J Clin Hypertens (Greenwich)* 2020; 22: 150-6.  
29  
30 345 31 He FJ, Li J, Macgregor GA. Effect of longer term modest salt reduction on blood pressure: Cochrane systematic review  
31 346 and meta-analysis of randomised trials. *BMJ* 2013; 346: f1325.  
32  
33 347 32 Gando Y, Sawada SS, Kawakami R, *et al*. Combined association of cardiorespiratory fitness and family history of  
34 348 hypertension on the incidence of hypertension: a long-term cohort study of Japanese males. *Hypertens Res* 2018; 41: 1063-9.  
35  
36 349 33 Bo Y, Guo C, Lin C, *et al*. Dynamic changes in leong-term exposure to ambient particulate matter and incidence of  
37 350 hypertension in adults. *Hypertension* 2019; 74: 669-77.  
38  
39 351 34 Trudel X, Brisson C, Gilbert-Ouimet M, *et al*. Long working hours and the prevalence of masked and sustained  
40 352 hypertension. *Hypertension* 2020; 75: 532-8.  
41  
42 353 35 Li J, Shi L, Li S, *et al*. Urban-rural disparities in hypertension prevalence, detection, and medication use among Chinese  
43 354 Adults from 1993 to 2011. *Int J Equity Health* 2017, 16: 50.  
44  
45 355 36 Yu X, Zhang W. All-cause mortality rate in China: do residents in economically developed regions have better health?  
46 356 *Int J Equity Health* 2020, 19: 12.  
47  
48 357 37 Arici M, Turgan C, Altun B, *et al*. Hypertension incidence in Turkey (HinT): a population-based study. *J Hypertens* 2010;  
49 358 28: 240-4.  
50  
51 359 38 Feng XL, Pang M, Beard J. Health system strengthening and hypertension awareness, treatment and control: data from  
52 360 the China Health and Retirement Longitudinal Study. *Bull World Health Organ* 2014; 92: 29-41.  
53  
54 361 39 Kim BJ, Seo DC, Kim BS, *et al*. Relationship between cotinine-verified smoking status and incidence of hypertension in  
55  
56  
57  
58  
59  
60

362 74,743 Korean adults. *Circ J* 2018; 82: 1659-65.

363 40 Gao K, Shi X, Wang W. The life-course impact of smoking on hypertension, myocardial infarction and respiratory  
364 diseases. *Sci Rep* 2017, 7: 4330.

365 41 Li G, Wang H, Wang K, *et al.* The association between smoking and blood pressure in men: a cross-sectional study. *BMC*  
366 *Public Health* 2017, 17: 797.

367 42 Kim Y, Sharp S, Hwang S, *et al.* Exercise and incidence of myocardial infarction, stroke, hypertension, type 2 diabetes  
368 and site-specific cancers: prospective cohort study of 257 854 adults in South Korea. *BMJ Open* 2019; 9: e025590.

369 43 Lu Y, Lu M, Dai H, *et al.* Lifestyle and risk of hypertension: follow-up of a young pre-hypertensive cohort. *Int J Med Sci*  
370 2015, 12: 605-12.

371 44 Jayawardana NWIA, Jayalath WATA, Madhujith WMT, *et al.* Aging and obesity are associated with undiagnosed  
372 hypertension in a cohort of males in the Central Province of Sri Lanka: a cross-sectional descriptive study. *BMC Cardiovasc*  
373 *Disord* 2017; 17: 165.

374 45 Sinnott SJ, Smeeth L, Williamson E, *et al.* Trends for prevalence and incidence of resistant hypertension: population  
375 based cohort study in the UK 1995-2015. *BMJ* 2017; 358: j3984.

376 46 Zhou W, Shi Y, Li YQ, *et al.* Body mass index, abdominal fatness, and hypertension incidence: a dose-response meta-  
377 analysis of prospective studies. *J Hum Hypertens* 2018; 32: 321-33.

378 47 Roerecke M, Kaczorowski J, Tobe SW, *et al.* The effect of a reduction in alcohol consumption on blood pressure: a  
379 systematic review and meta-analysis. *Lancet Public Health* 2017; 2: e108-20.

380 48 Whelton PK, Carey RM, Aronow WS, *et al.* 2017  
381 ACC/AHA/AAPA/ABC/ACPM/AGS/APhA/ASH/ASPC/NMA/PCNA Guideline for the Prevention, Detection, Evaluation,  
382 and Management of High Blood Pressure in Adults: Executive Summary: A Report of the American College of  
383 Cardiology/American Heart Association Task Force on Clinical Practice Guidelines. *Circulation* 2018; 138: e426-83.

384 49 Holmes MV, Dale CE, Zuccolo L, *et al.* Association between alcohol and cardiovascular disease: Mendelian  
385 randomisation analysis based on individual participant data. *BMJ* 2014; 349: g4164.

386

387 Figure 1 Flowchart showing the selection of the subjects who were included in the final analysis of  
388 hypertension incidence in China, with covariate information missing rate of 9.78%

389

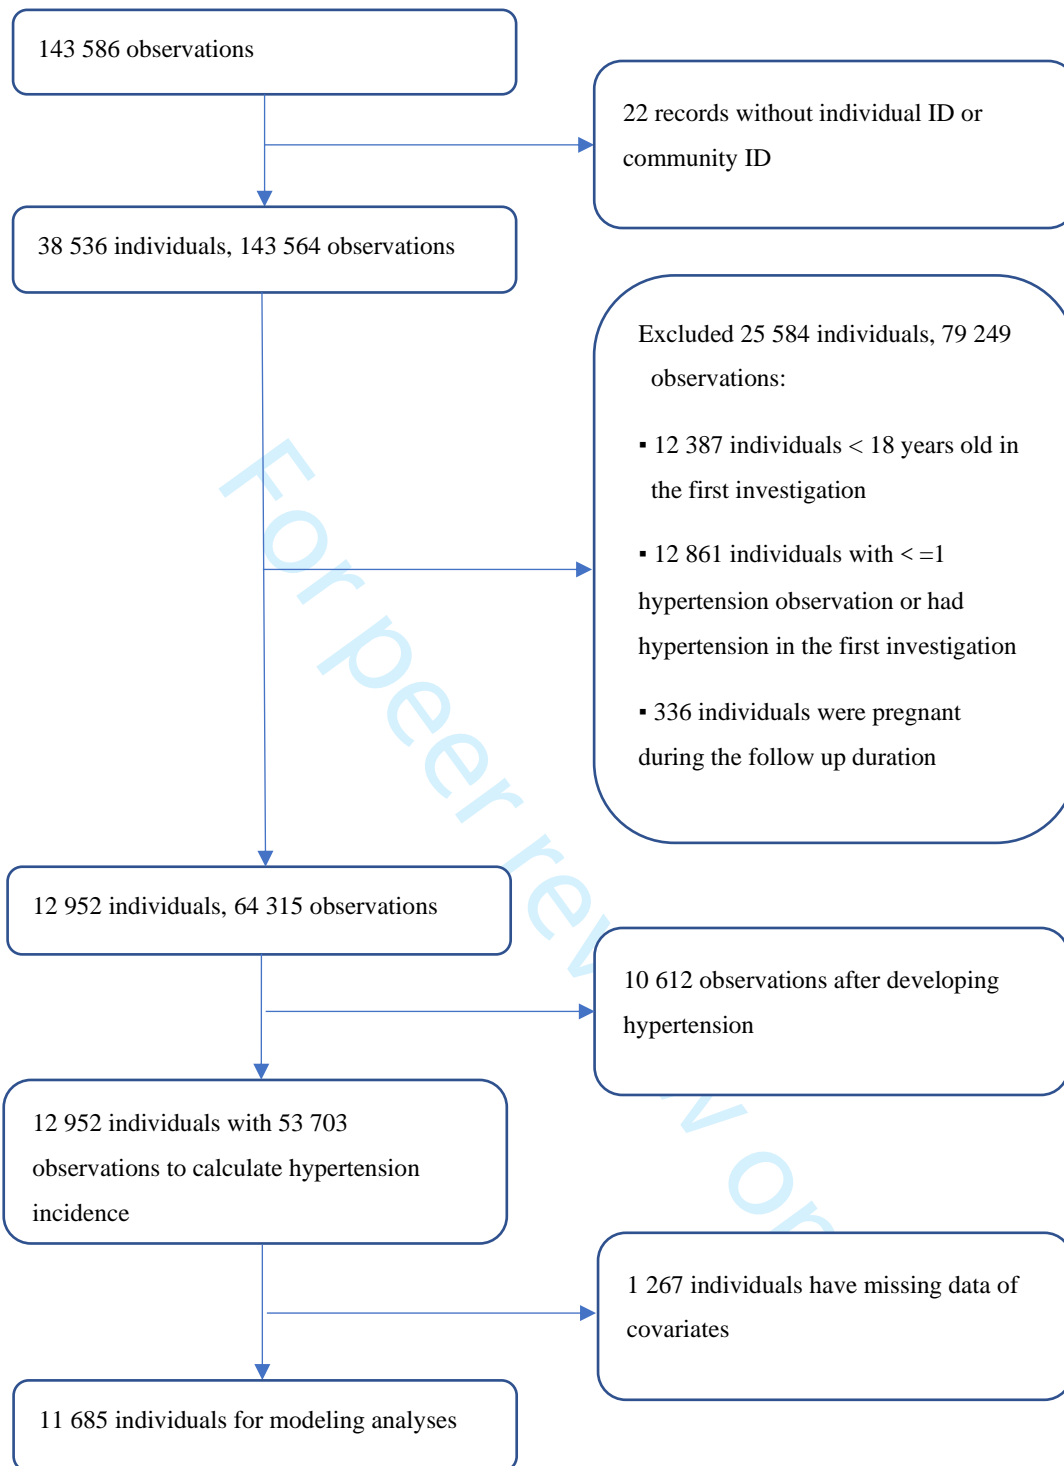



| <b>Results</b>           |     |                                                                                                                                                                                                                                                                                                 |                                         |
|--------------------------|-----|-------------------------------------------------------------------------------------------------------------------------------------------------------------------------------------------------------------------------------------------------------------------------------------------------|-----------------------------------------|
| Participants             | 13* | (a) Report numbers of individuals at each stage of study—eg numbers potentially eligible, examined for eligibility, confirmed eligible, included in the study, completing follow-up, and analysed<br>(b) Give reasons for non-participation at each stage<br>(c) Consider use of a flow diagram | page 8, figure 1, and table 1 in page 9 |
| Descriptive data         | 14* | (a) Give characteristics of study participants (eg demographic, clinical, social) and information on exposures and potential confounders                                                                                                                                                        | page 9-11                               |
|                          |     | (b) Indicate number of participants with missing data for each variable of interest                                                                                                                                                                                                             | page 11-12                              |
|                          |     | (c) <i>Cohort study</i> —Summarise follow-up time (eg, average and total amount)                                                                                                                                                                                                                | page 13                                 |
| Outcome data             | 15* | <i>Cohort study</i> —Report numbers of outcome events or summary measures over time                                                                                                                                                                                                             | Cohort study: page 13                   |
|                          |     | <i>Case-control study</i> —Report numbers in each exposure category, or summary measures of exposure                                                                                                                                                                                            |                                         |
|                          |     | <i>Cross-sectional study</i> —Report numbers of outcome events or summary measures                                                                                                                                                                                                              |                                         |
| Main results             | 16  | (a) Give unadjusted estimates and, if applicable, confounder-adjusted estimates and their precision (eg, 95% confidence interval). Make clear which confounders were adjusted for and why they were included                                                                                    | page 13-16                              |
|                          |     | (b) Report category boundaries when continuous variables were categorized                                                                                                                                                                                                                       | page 15                                 |
|                          |     | (c) If relevant, consider translating estimates of relative risk into absolute risk for a meaningful time period                                                                                                                                                                                | not applicable                          |
| Other analyses           | 17  | Report other analyses done—eg analyses of subgroups and interactions, and sensitivity analyses                                                                                                                                                                                                  | not applicable                          |
| <b>Discussion</b>        |     |                                                                                                                                                                                                                                                                                                 |                                         |
| Key results              | 18  | Summarise key results with reference to study objectives                                                                                                                                                                                                                                        | page 17-19                              |
| Limitations              | 19  | Discuss limitations of the study, taking into account sources of potential bias or imprecision.                                                                                                                                                                                                 |                                         |
|                          |     | Discuss both direction and magnitude of any potential bias                                                                                                                                                                                                                                      | page 19-20                              |
| Interpretation           | 20  | Give a cautious overall interpretation of results considering objectives, limitations, multiplicity of analyses, results from similar studies, and other relevant evidence                                                                                                                      | page 19                                 |
| Generalisability         | 21  | Discuss the generalisability (external validity) of the study results                                                                                                                                                                                                                           | page 17-19                              |
| <b>Other information</b> |     |                                                                                                                                                                                                                                                                                                 |                                         |
| Funding                  | 22  | Give the source of funding and the role of the funders for the present study and, if applicable, for the original study on which the present article is based                                                                                                                                   | page 20                                 |

\*Give information separately for cases and controls in case-control studies and, if applicable, for exposed and unexposed groups in cohort and cross-sectional studies.

**Note:** An Explanation and Elaboration article discusses each checklist item and gives methodological background and published examples of transparent reporting. The STROBE checklist is best used in conjunction with this article (freely available on the Web sites of PLoS Medicine at <http://www.plosmedicine.org/>, Annals of Internal Medicine at <http://www.annals.org/>, and Epidemiology at <http://www.epidem.com/>). Information on the STROBE Initiative is available at [www.strobe-statement.org](http://www.strobe-statement.org).
